# Supplementary material for: Synthesis of sterically congested double helicene by alkyne cycloisomerization
Source: Royal Society of Chemistry journal article supplement (doi:10.1039/d4cc01573h), 2024-01-01
Supplement: d4cc01573h1.pdf [file d4cc01573h1.pdf]

## Supporting Information

### **Synthesis of sterically congested double helicene by alkyne cycloisomerization**

**Junichiro Hirano,<sup>1</sup> Sayaka Miyoshi,<sup>1</sup> Eiji Yashima,<sup>1</sup> Tomoyuki Ikai,<sup>1,2</sup> Hiroshi Shinokubo<sup>1,3</sup>  
and Norihito Fukui\*<sup>1,2</sup>**

<sup>1</sup>Department of Molecular and Macromolecular Chemistry, Graduate School of Engineering,  
Nagoya University, Furo-cho, Chikusa-ku, Nagoya, Aichi 464-8603, Japan

<sup>2</sup>PRESTO, Japan Science and Technology Agency (JST), Kawaguchi, Saitama 332-0012

<sup>3</sup>Integrated Research Consortium on Chemical Science (IRCCS), Nagoya University, Furo-cho,  
Chikusa-ku, Nagoya, Aichi 464-8603, Japan.

E-mail: [fukui@chembio.nagoya-u.ac.jp](mailto:fukui@chembio.nagoya-u.ac.jp)

## Table of Contents

|                                                    |    |
|----------------------------------------------------|----|
| 1. Instrumentation and materials .....             | 3  |
| 2. Experimental procedures and compound data ..... | 4  |
| 3. NMR spectra .....                               | 7  |
| 4. Mass spectra .....                              | 23 |
| 5. Crystal data.....                               | 29 |
| 6. Resolution and inversion dynamics.....          | 30 |
| 7. Cyclic voltammograms .....                      | 31 |
| 8. DFT Calculations .....                          | 32 |
| 9. References .....                                | 44 |

## 1. Instrumentation and materials

---

$^1\text{H}$  NMR (500 MHz) and  $^{13}\text{C}$  NMR (126 MHz) spectra were recorded on a Bruker AVANCE III HD spectrometer.  $^1\text{H}$  NMR (600 MHz) and  $^{13}\text{C}$  NMR (151 MHz) spectra were recorded on a JEOL JNM-ECA600II spectrometer. Chemical shifts were reported as the delta scale in ppm relative to  $\text{CHCl}_3$  ( $\delta = 7.26$  ppm) for  $^1\text{H}$  NMR and  $\text{CDCl}_3$  ( $\delta = 77.16$  ppm) for  $^{13}\text{C}$  NMR. UV/vis/NIR absorption spectra were recorded on a Shimadzu UV-2550 or JASCO V 670 spectrometer. High-resolution atmospheric pressure chemical ionization time-of-flight (APCI-TOF) mass spectra were taken on a Bruker micrOTOF instrument using a positive ionization mode. X-ray data were obtained using a Rigaku CCD diffractometer (Saturn 724 with MicroMax-007) with Varimax Mo optics. Cyclic voltammograms were obtained under the following conditions; solvent:  $\text{CH}_2\text{Cl}_2$ , electrolyte: 0.1 M  $\text{Bu}_4\text{NPF}_6$ , working electrode: glassy carbon, counter electrode: Pt, reference electrode:  $\text{Ag}/\text{AgNO}_3$ , scan rate: 0.05 V/s. Gel permeation chromatography (GPC) was conducted using a JAIGEL-2HR Plus equipped with a JAI LabACE LC-7080 plus preparative HPLC instrument. All calculations were carried out using the *Gaussian 16* software package.<sup>1</sup> Initial geometry for the calculations of **1** was obtained from the X-ray crystal structure. All calculations were performed with the density functional theory (DFT) method with the restricted B3LYP<sup>2</sup> level, employing the 6-31G(d) basis sets.

Dry toluene was purchased from KANTO CHEMICAL CO., INC. as a dehydrated grade. Unless otherwise noted, materials obtained from commercial suppliers were used without further purification.

## 2. Experimental procedures and compound data

### 1-Bromo-2-(2,6-dimethyl-4-butoxyphenylethynyl)benzene **S1**

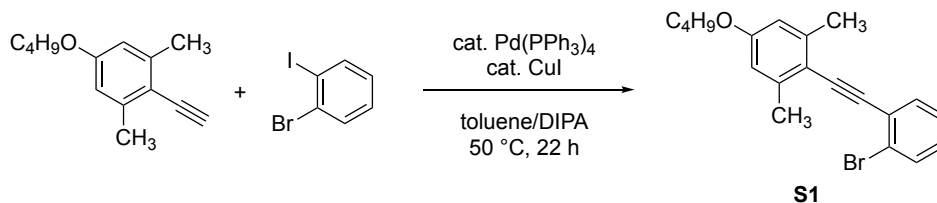

To a mixture of 1-bromo-2-iodobenzene (12.3 g, 43.5 mmol), copper(I) iodide (CuI) (0.16 g, 0.83 mmol), and tetrakis(triphenylphosphine)palladium(0) ( $\text{Pd(PPh}_3)_4$ ) (0.49 g, 0.42 mmol) in a degassed toluene/diisopropylamine (DIPA) mixture ( $v/v=4/1$ ; 330 mL) was added 5-butoxy-2-ethynyl-1,3-dimethylbenzene<sup>3</sup> (8.40 g, 41.5 mmol). After stirring at  $50\text{ }^\circ\text{C}$  for 22 h, the mixture was cooled to room temperature and diluted with hexane. The solution was washed with aqueous 1 N HCl, saturated aqueous  $\text{NaHCO}_3$ , and water, and then dried over  $\text{Na}_2\text{SO}_4$ . The solvents were removed under reduced pressure and the crude product was purified by silica gel chromatography using hexane/chloroform ( $v/v=9/1$ ) as the eluent to give the desired product **S1** as a pale yellow solid (11.3 g, 76%).

$^1\text{H NMR}$  (500 MHz,  $\text{CDCl}_3$ , 298 K):  $\delta = 7.61$  (dd,  $J = 1.0, 8.1$  Hz, 1H), 7.55 (dd,  $J = 1.6, 7.8$  Hz, 1H), 7.27 (dt,  $J = 1.2, 11.4$  Hz, 1H), 7.14 (dt,  $J = 1.7, 11.5$  Hz, 1H), 6.63 (s, 2H), 3.96 (t,  $J = 6.6$  Hz, 2H), 2.53 (s, 6H), 1.76 (quin,  $J = 7.1$  Hz, 2H), 1.49 (sext,  $J = 7.5$  Hz, 2H), 0.98 (t,  $J = 7.4$  Hz, 1H) ppm;  $^{13}\text{C NMR}$  (126 MHz,  $\text{CDCl}_3$ , 298 K):  $\delta = 159.2, 142.6, 133.2, 132.6, 128.8, 127.1, 126.5, 125.0, 114.9, 113.2, 94.9, 92.4, 67.7, 31.4, 21.7, 19.4, 14.0$  ppm; HRMS (APCI):  $[\text{M}+\text{H}]^+$  Calcd for  $\text{C}_{20}\text{H}_{22}\text{BrO}$  357.0849; Found 357.0842.

### Boronic acid **S2**

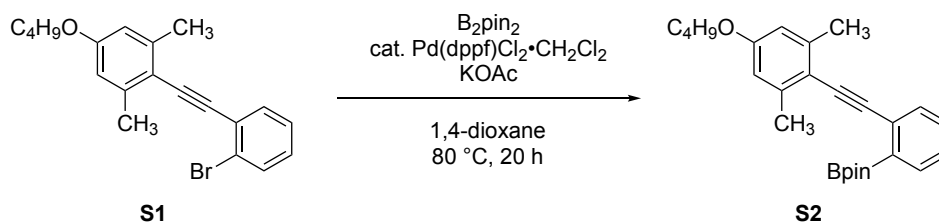

To a mixture of **S1** (1.19 g, 3.32 mmol), bis(pinacolato)diboron ( $\text{(Bpin)}_2$ ) (1.01 g, 3.99 mmol), and potassium acetate (1.31 g, 13.4 mmol) in anhydrous 1,4-dioxane (17 mL) was added [1,1'-bis(diphenylphosphino)ferrocene]palladium(II) dichloride dichloromethane adduct ( $\text{Pd(dppf)Cl}_2 \cdot \text{CH}_2\text{Cl}_2$ ) (0.11 g, 0.13 mmol). After stirring at  $80\text{ }^\circ\text{C}$  for 20 h, the mixture was cooled

to room temperature and diluted with chloroform. The solution was washed with water, and then dried over Na<sub>2</sub>SO<sub>4</sub>. The solvent was removed under reduced pressure and the residue was passed through a short pad of silica gel using hexane/ethyl acetate (*v/v* = 9/1) as the eluent. After removing the solvent by evaporation, a pale yellow solid (1.11 g) containing the target compound **S2** obtained, which was used for the next step without further purification.

<sup>1</sup>H NMR (500 MHz, CDCl<sub>3</sub>, 298 K): δ = 7.82 (dd, *J* = 0.95, 7.5 Hz, 1H), 7.57 (dd, *J* = 0.58, 7.8 Hz, 1H), 7.38 (dt, *J* = 1.5, 11.4 Hz, 1H), 7.27 (dt, *J* = 1.2, 11.2 Hz, 1H), 6.62 (s, 2H), 3.96 (t, *J* = 6.5 Hz, 2H), 2.56 (s, 6H), 1.76 (quin, *J* = 7.0 Hz, 2H), 1.49 (sext, *J* = 7.5 Hz, 2H), 0.98 (t, *J* = 7.4 Hz, 1H) ppm. δ = 1.27, 1.26 is peaks of impurities by B<sub>2</sub>pin<sub>2</sub>; <sup>13</sup>C NMR (126 MHz, CDCl<sub>3</sub>, 298 K): δ = 158.7, 142.5, 135.9, 133.2, 130.6, 129.3, 126.9, 116.0, 113.0, 97.3, 90.0, 84.0, 67.7, 31.5, 25.2, 25.0, 24.7, 21.7, 19.4, 14.0 ppm; HRMS (APCI): [M]<sup>+</sup> Calcd for C<sub>26</sub>H<sub>33</sub>BO<sub>3</sub> 403.2554; Found 403.2543.

#### Precursor 4

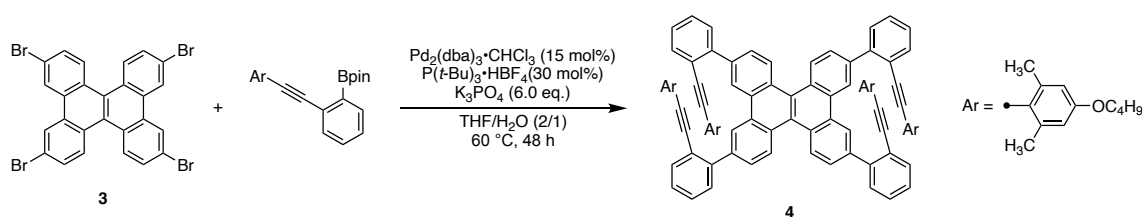

A Schlenk flask containing 2,7,10,15-tetrabromodibenzo[*g,p*]chrysene (**3**) (26 mg, 40 μmol), *ortho*-alkynylphenylboronic acid (97 mg, 240 μmol), Pd<sub>2</sub>(dba)<sub>3</sub>·CHCl<sub>3</sub> (8.3 mg, 8 μmol), P(*t*-Bu)<sub>3</sub>·HBF<sub>4</sub> (4.6 mg, 16 μmol), and K<sub>3</sub>PO<sub>4</sub> (51 mg, 240 μmol) was purged with N<sub>2</sub>. To the mixture, degassed dry toluene (0.6 mL) and water (0.3 mL) were added. The mixture was stirred at 60 °C for 48 h. The reaction mixture was cooled to room temperature. The reaction mixture was extracted with CH<sub>2</sub>Cl<sub>2</sub>. The organic phase was washed with brine and dried over anhydrous Na<sub>2</sub>SO<sub>4</sub>. After removal of the solvent *in vacuo*, the mixture was purified by silica gel column chromatography (eluent: CH<sub>2</sub>Cl<sub>2</sub>/hexane = 1/1). The roughly purified mixture was further purified by GPC with CHCl<sub>3</sub> as eluent. After removal of the solvent *in vacuo*, compound **4** (20 mg, 13 μmol, 35%) was obtained as a white solid.

<sup>1</sup>H NMR (500 MHz, CDCl<sub>3</sub>, 298 K): δ = 8.69 (d, *J* = 1.7 Hz, 4H), 8.79 (d, *J* = 8.5 Hz, 4H), 7.99 (dd, *J* = 1.6, 8.5 Hz, 4H), 7.73–7.71 (m, 4H), 7.46–7.44 (m, 4H), 7.40–7.38 (m, 8H), 6.43 (s, 8H), 3.79 (t, *J* = 6.5 Hz, 8H), 2.21 (s, 24H), 1.65 (quin, *J* = 7.0 Hz, 8H), 1.39 (sext, *J* = 7.5 Hz, 8H), 0.90 (t, *J* = 7.4 Hz, 12H) ppm; <sup>13</sup>C NMR (126 MHz, CDCl<sub>3</sub>, 298 K): δ = 158.7, 143.0, 142.2,

139.4, 133.2, 130.9, 129.9, 129.0, 128.7, 128.6, 128.3, 128.2, 127.7, 127.4, 124.6, 123.2, 96.0, 91.2, 67.6, 31.2, 29.8, 21.4, 19.3, 14.0 ppm; HRMS (APCI):  $[M+H]^+$  Calcd for  $C_{106}H_{97}O_4$  1433.7381; Found 1433.7340.

### Sterically congested double helicene **1**

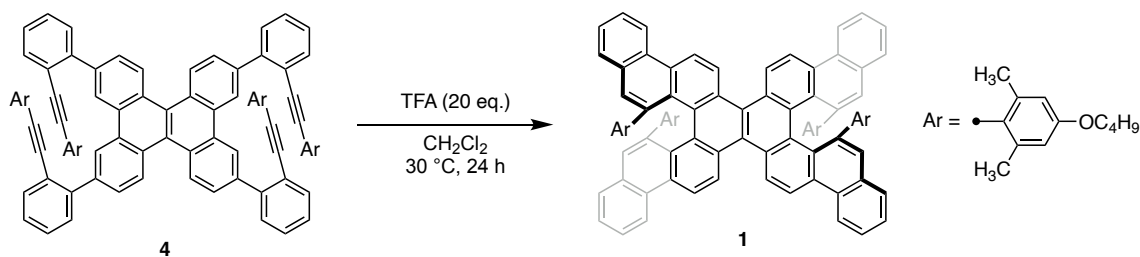

A Schlenk flask containing compound **4** (19 mg, 13  $\mu\text{mol}$ ) was purged with  $N_2$ . To the flask, degassed  $CH_2Cl_2$  (1.0 mL) and 2,2,2-trifluoroacetic acid (0.02 mL) were added. The mixture was stirred at  $30\text{ }^\circ\text{C}$  for 24 h. The reaction mixture was quenched with  $NaHCO_3$  aq. and extracted with  $CH_2Cl_2$ . The organic phase was washed with brine and dried over anhydrous  $Na_2SO_4$ . After removal of the solvent *in vacuo*, the mixture was purified by silica gel column chromatography (eluent:  $CH_2Cl_2$ /hexane = 1/1). After removal of the solvent *in vacuo*, compound **1** (5.8 mg, 4.0  $\mu\text{mol}$ , 31%) was obtained as a yellow solid.

$^1H$  NMR (600 MHz,  $CDCl_3$ , 298 K):  $\delta$  = 8.75 (d,  $J$  = 4.2 Hz, 4H), 8.63 (s, 8H), 7.79–7.76 (m, 8H), 7.64 (t,  $J$  = 7.0 Hz, 4H), 7.17 (s, 4H), 6.04 (d,  $J$  = 2.4 Hz, 4H), 5.94 (d,  $J$  = 2.4 Hz, 4H), 4.08–4.01 (m, 8H), 1.99 (quin,  $J$  = 7.2 Hz, 8H), 1.74 (sext,  $J$  = 7.5 Hz, 8H), 1.53 (s, 12H), 1.25 (s, 12H), 1.23 (t,  $J$  = 7.6 Hz, 12H) ppm;  $^{13}C$  NMR (151 MHz,  $CDCl_3$ , 298 K):  $\delta$  = 156.7, 138.0, 137.5, 134.1, 132.2, 130.8, 129.7, 129.5, 127.9, 126.7, 126.6, 126.5, 124.4, 123.3, 122.4, 114.4, 113.1, 67.7, 29.9, 20.8, 19.7, 19.2 ppm.; HRMS (APCI):  $[M+H]^+$  Calcd for  $C_{106}H_{97}O_4$  1433.7381; Found 1433.7344.; Preparative resolution was conducted by HPLC using a chiral column (Daicel Chiralpak IA: 20 $\times$ 250 mm, 254 nm UV detector, rt, eluent: 40%  $CH_2Cl_2$  in hexane, flow rate: 6 mL/min, retention time: 8.99 min for 1st fraction and 10.63 min for 2nd fraction); Purities of the obtained enantiomers were determined by HPLC analysis using a chiral column (Daicel Chiralpak IA-3: 4.6 $\times$ 250 mm, 254 nm UV detector, 293 K, eluent: 10% propan-2-ol in hexane, flow rate: 1 mL/min, retention time: 3.78 min for 1st fraction and 4.35 min for 2nd fraction).

### 3. NMR spectra

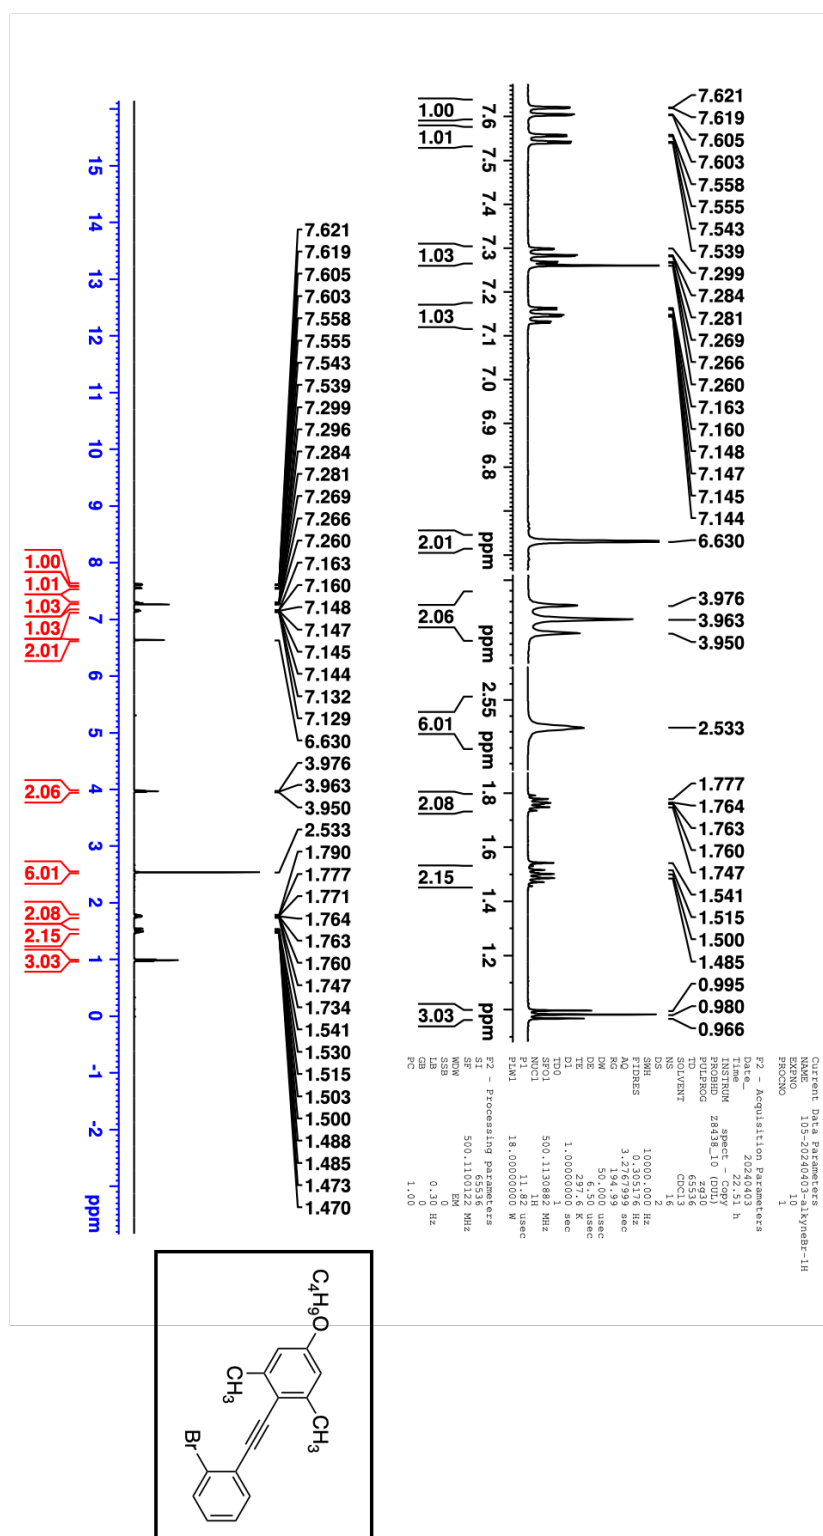

Figure S1. <sup>1</sup>H NMR spectrum of S1 in CDCl<sub>3</sub> at 25 °C.

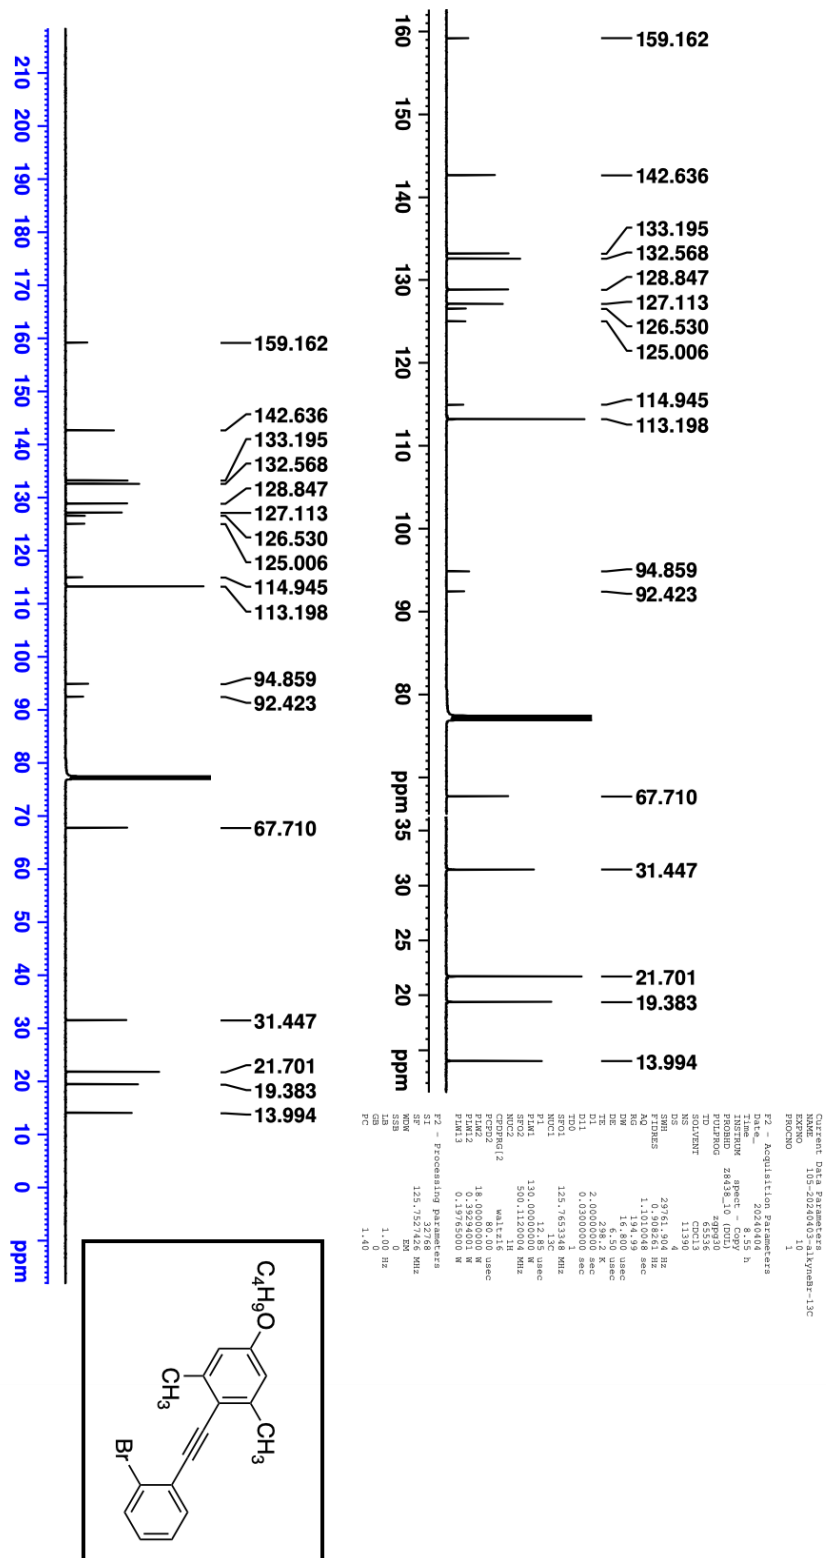

Figure S2. <sup>13</sup>C NMR spectrum of S1 in CDCl<sub>3</sub> at 25 °C.





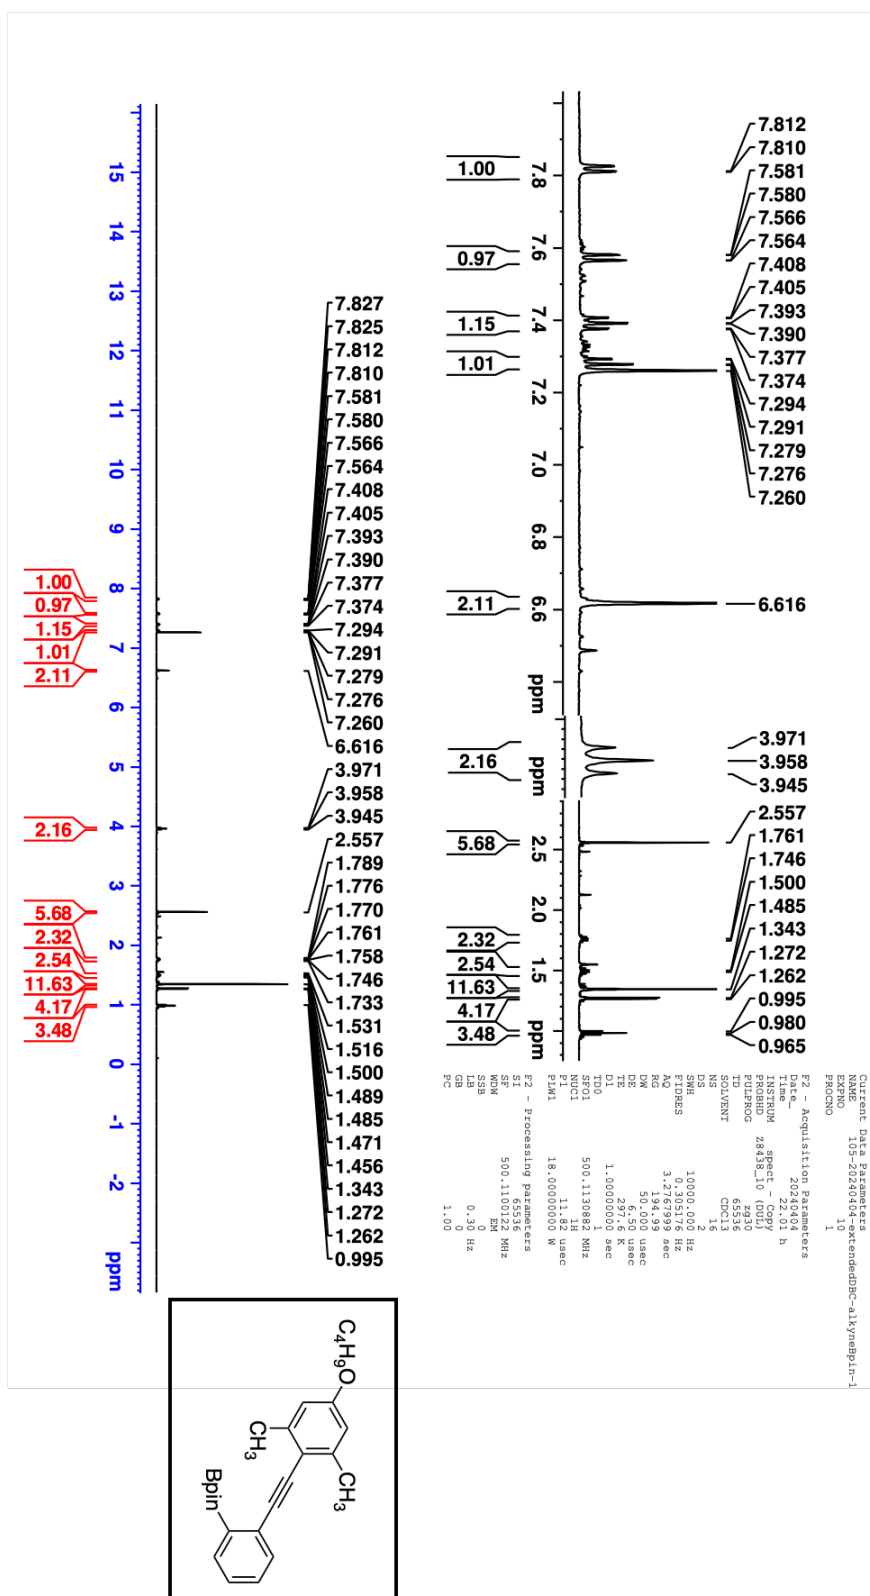

Figure S3. <sup>1</sup>H NMR spectrum of S2 without further purification in CDCl<sub>3</sub> at 25 °C.



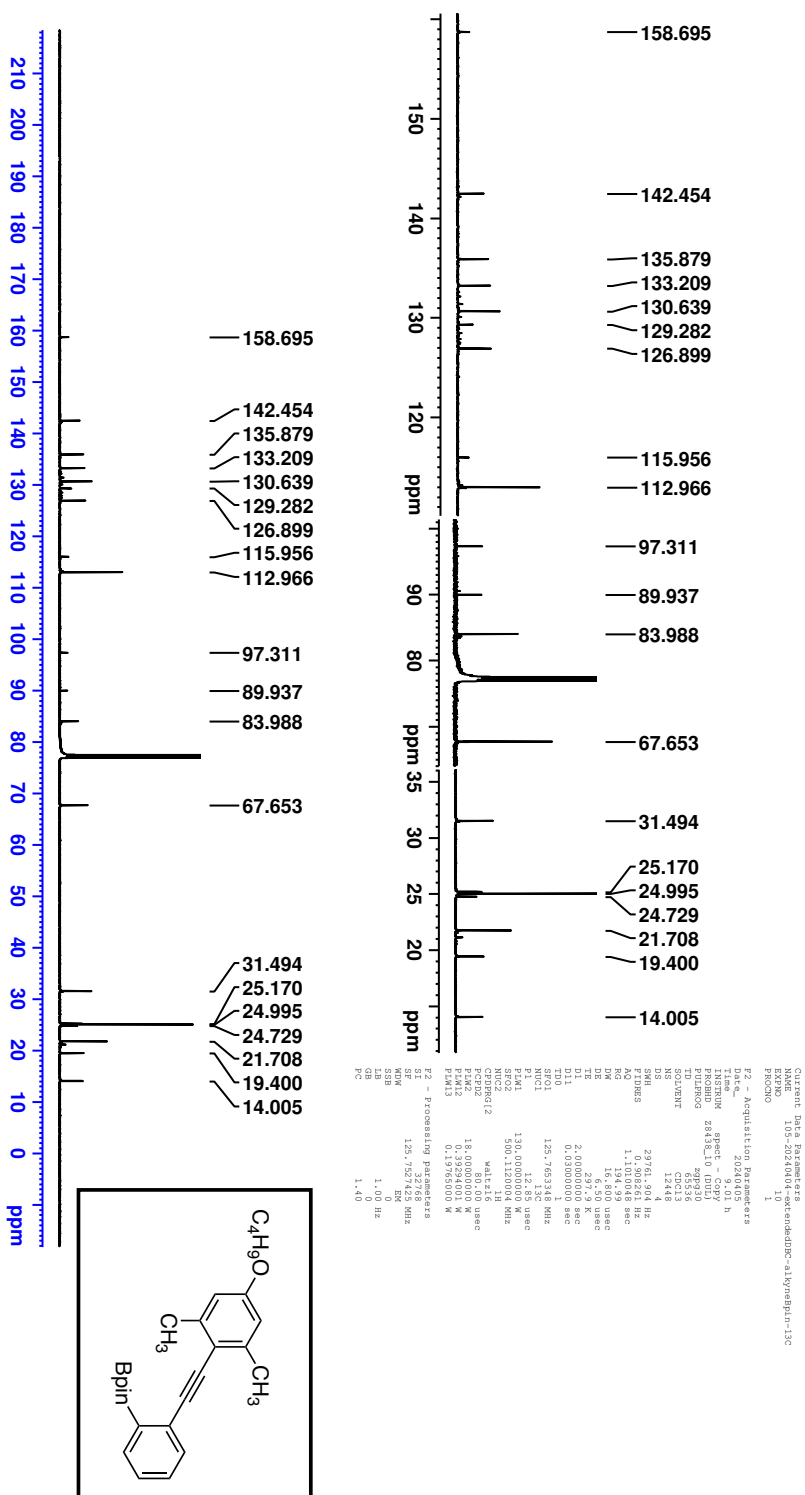

Figure S4. <sup>13</sup>C NMR spectrum of S2 without further purification in CDCl<sub>3</sub> at 25 °C.



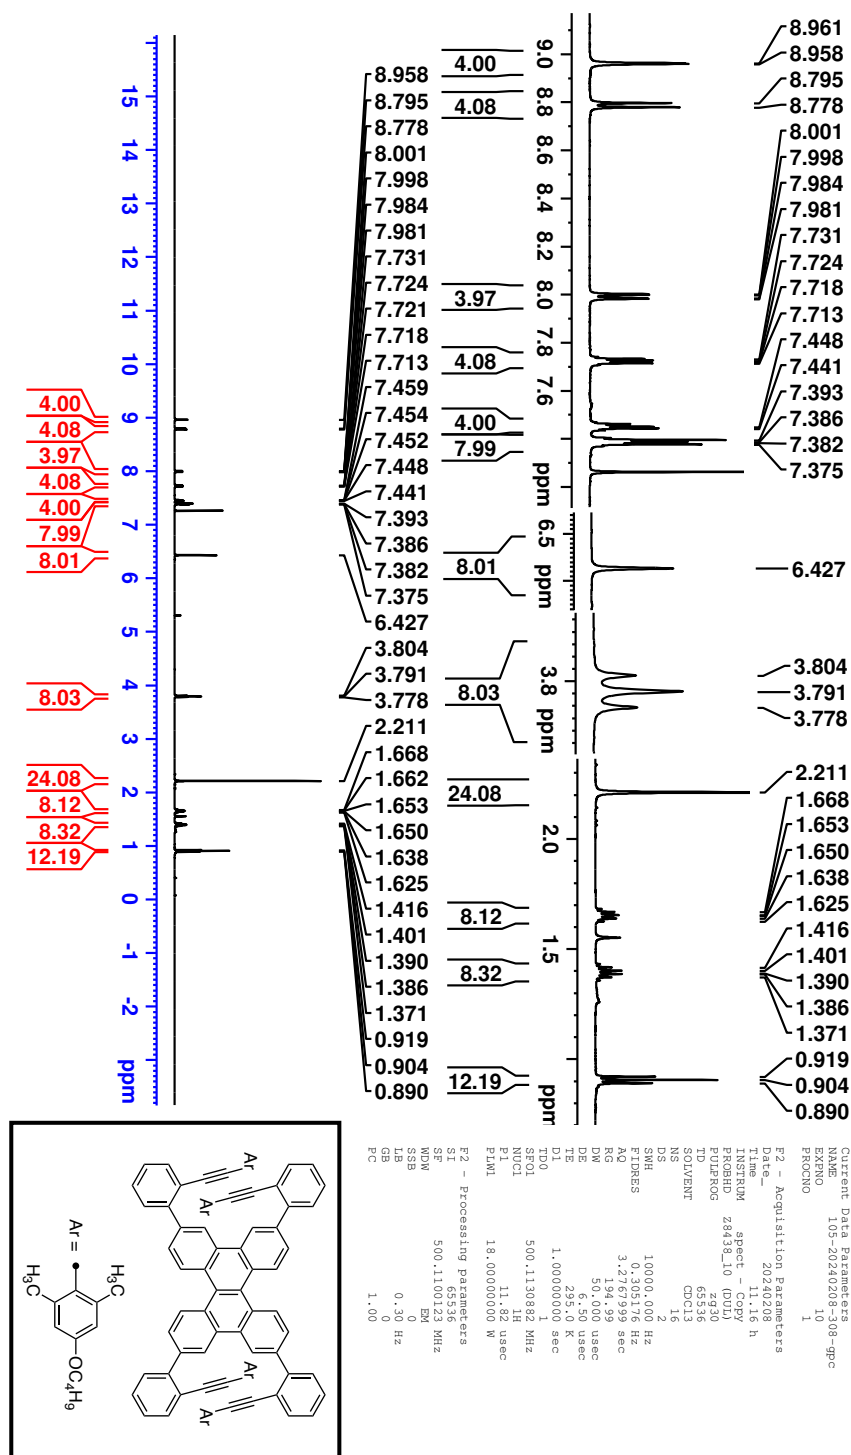

Figure S5. <sup>1</sup>H NMR spectrum of 4 in CDCl<sub>3</sub> at 25 °C.

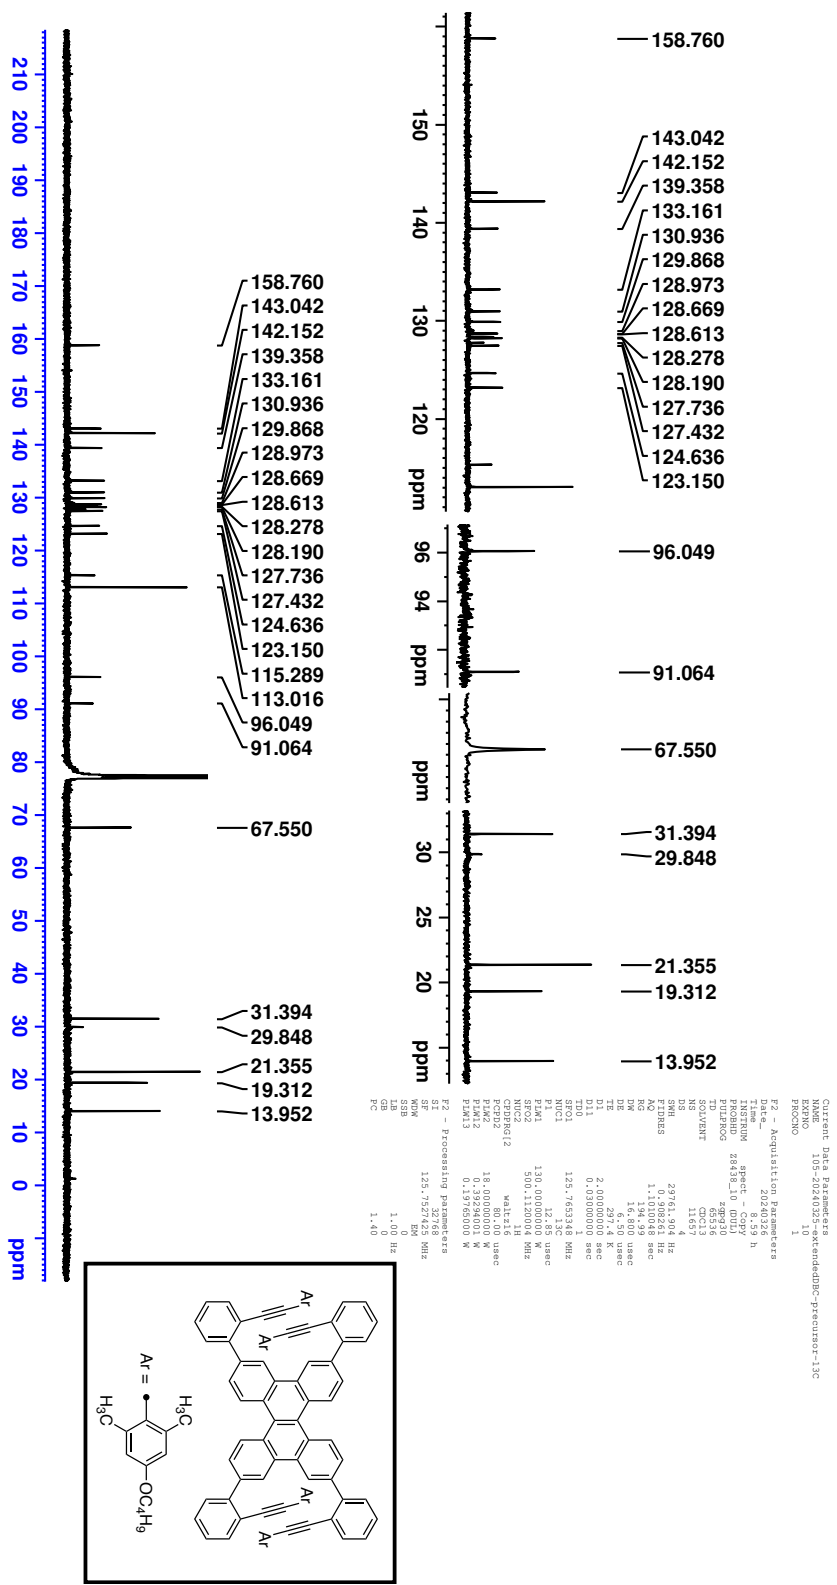

Figure S6.  $^{13}\text{C}$  NMR spectrum of **4** in  $\text{CDCl}_3$  at  $25^\circ\text{C}$ .





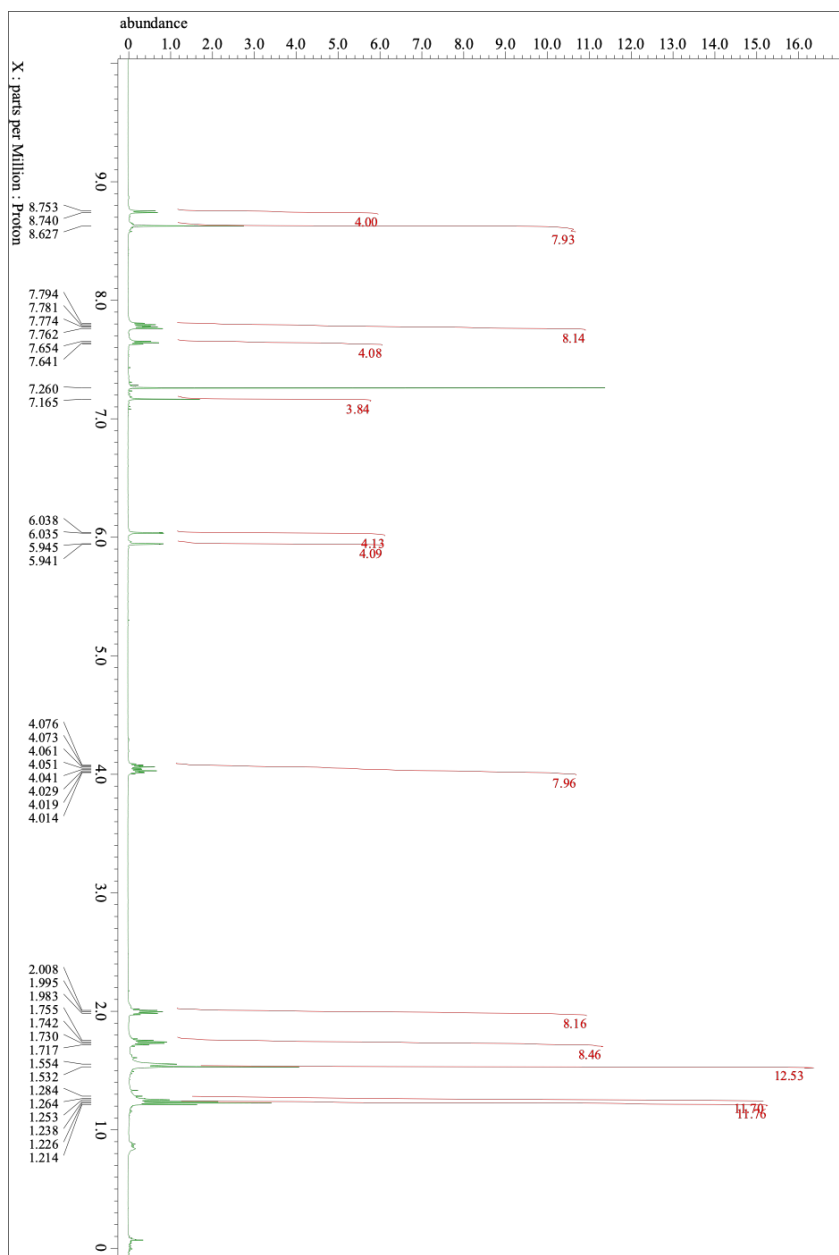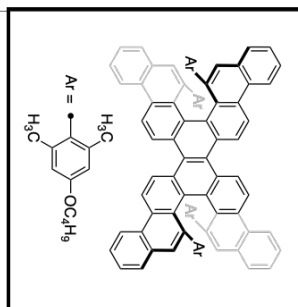

**Figure S7.** <sup>1</sup>H NMR spectrum of **1** in CDCl<sub>3</sub> at 25 °C.



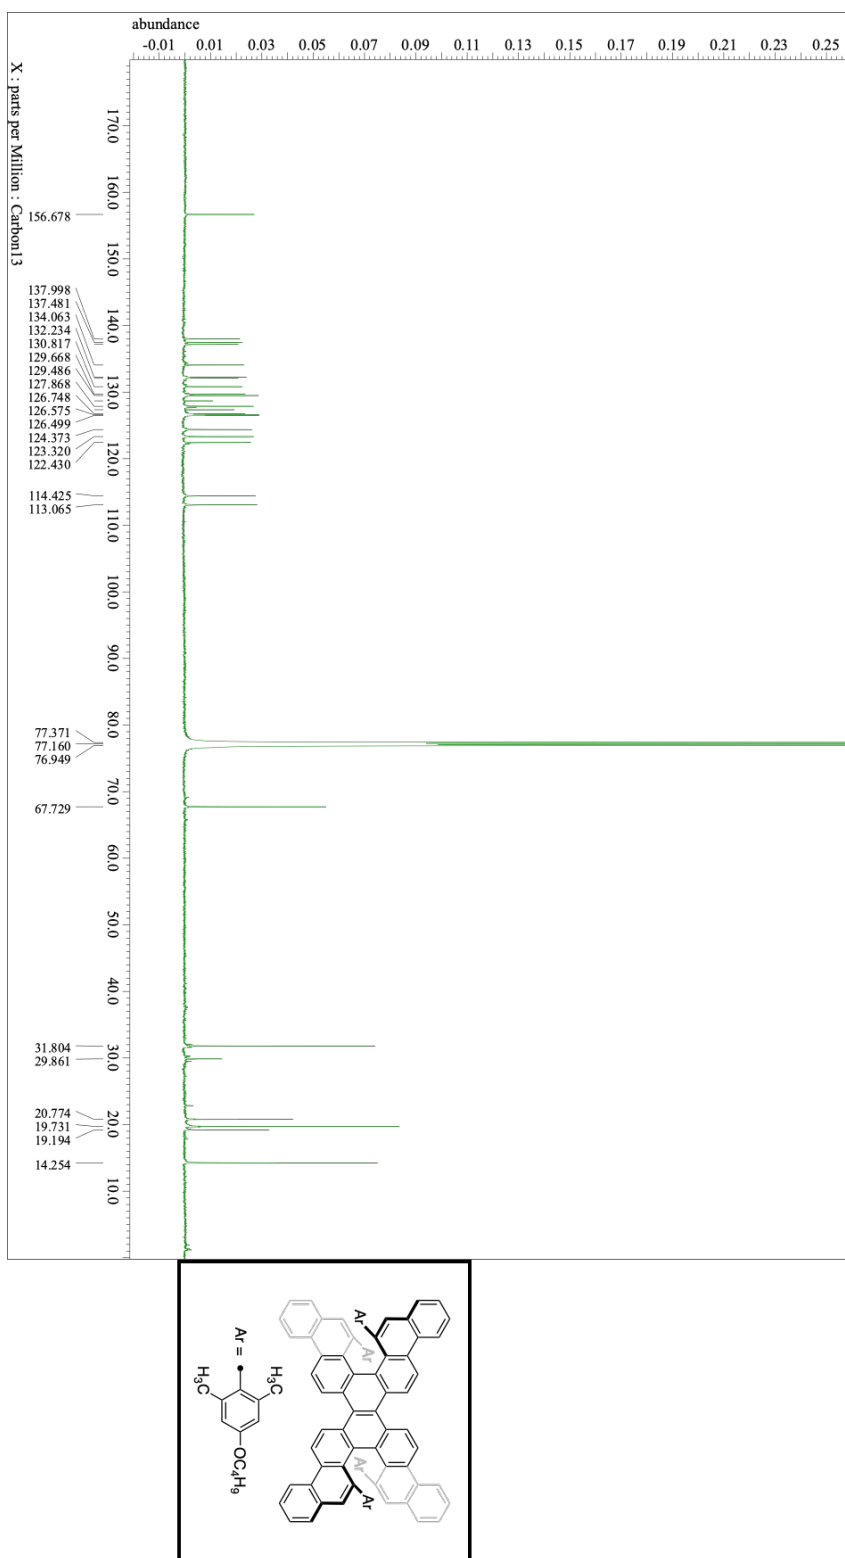

Figure S8.  $^{13}\text{C}$  NMR spectrum of **1** in  $\text{CDCl}_3$  at  $25\text{ }^\circ\text{C}$ .



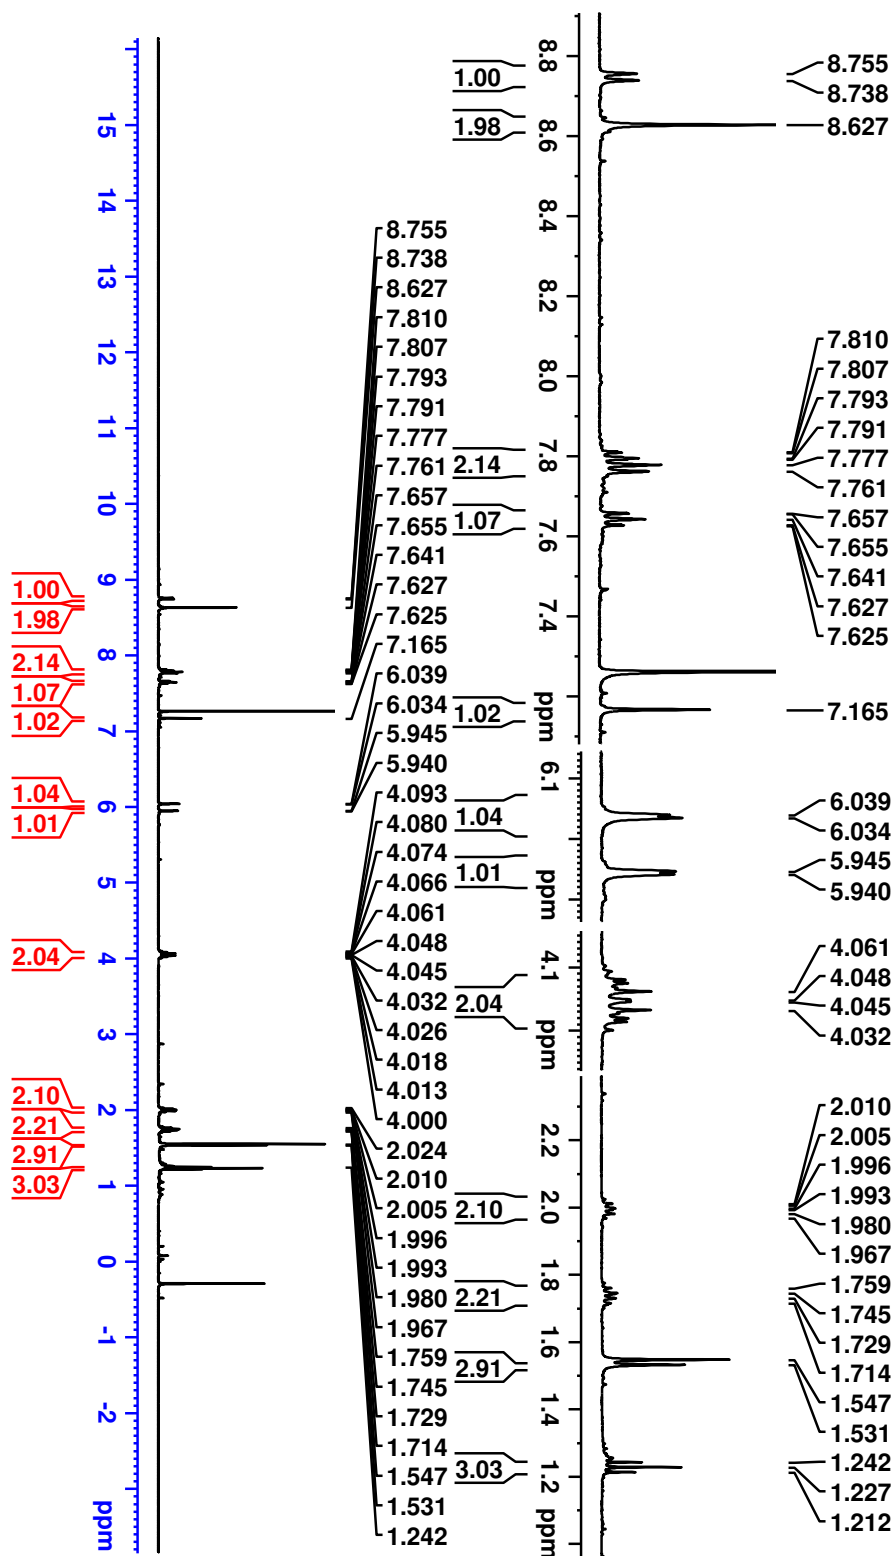

**Figure S9.**  $^1\text{H}$  NMR spectrum of the crude mixture given by the cycloisomerization of **4** in  $\text{CDCl}_3$  at 25  $^\circ\text{C}$ .



## 4. Mass spectra

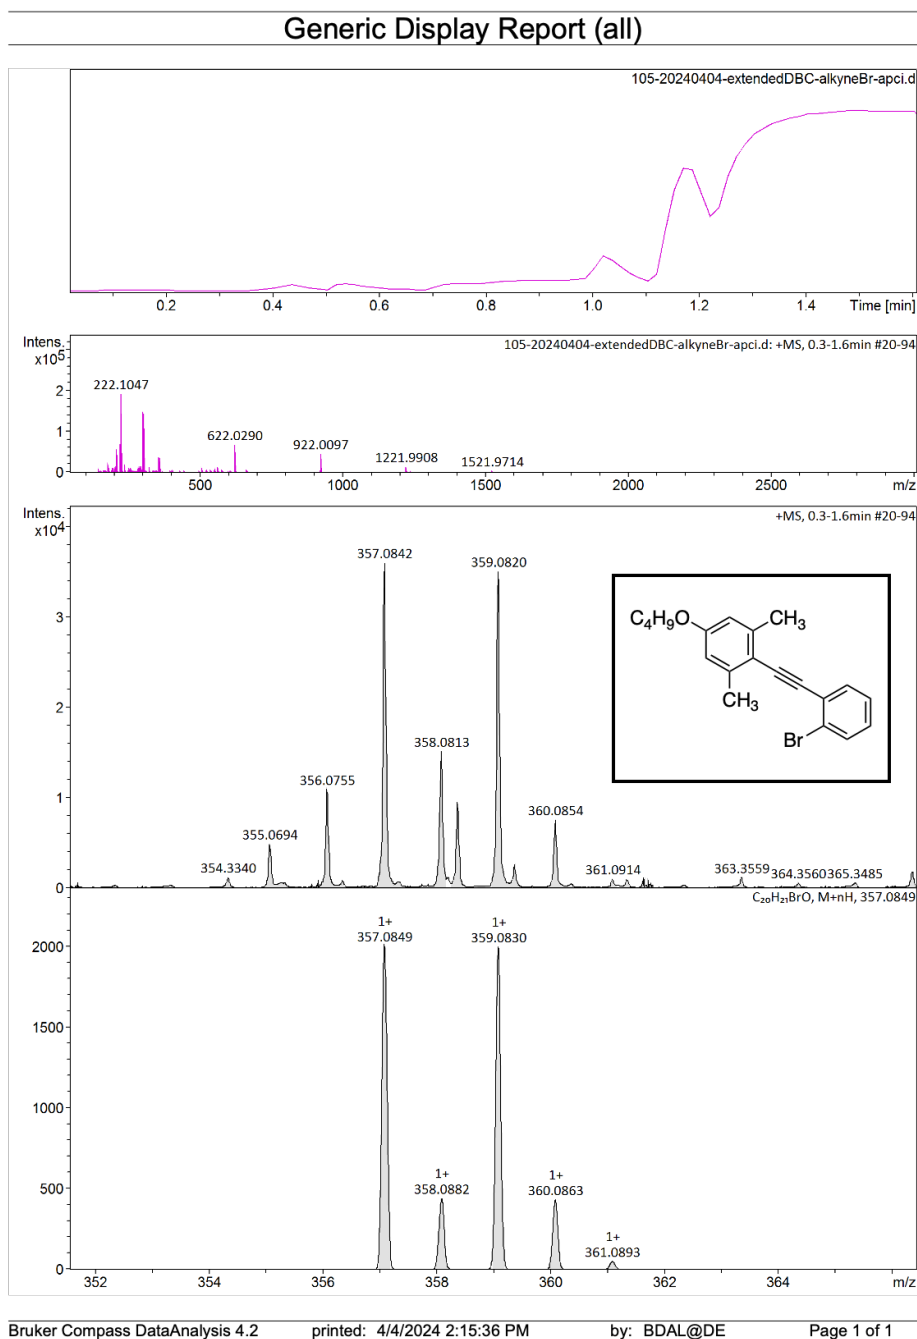

**Figure S10.** APCI-TOF mass spectrum of S1.

## Generic Display Report (all)

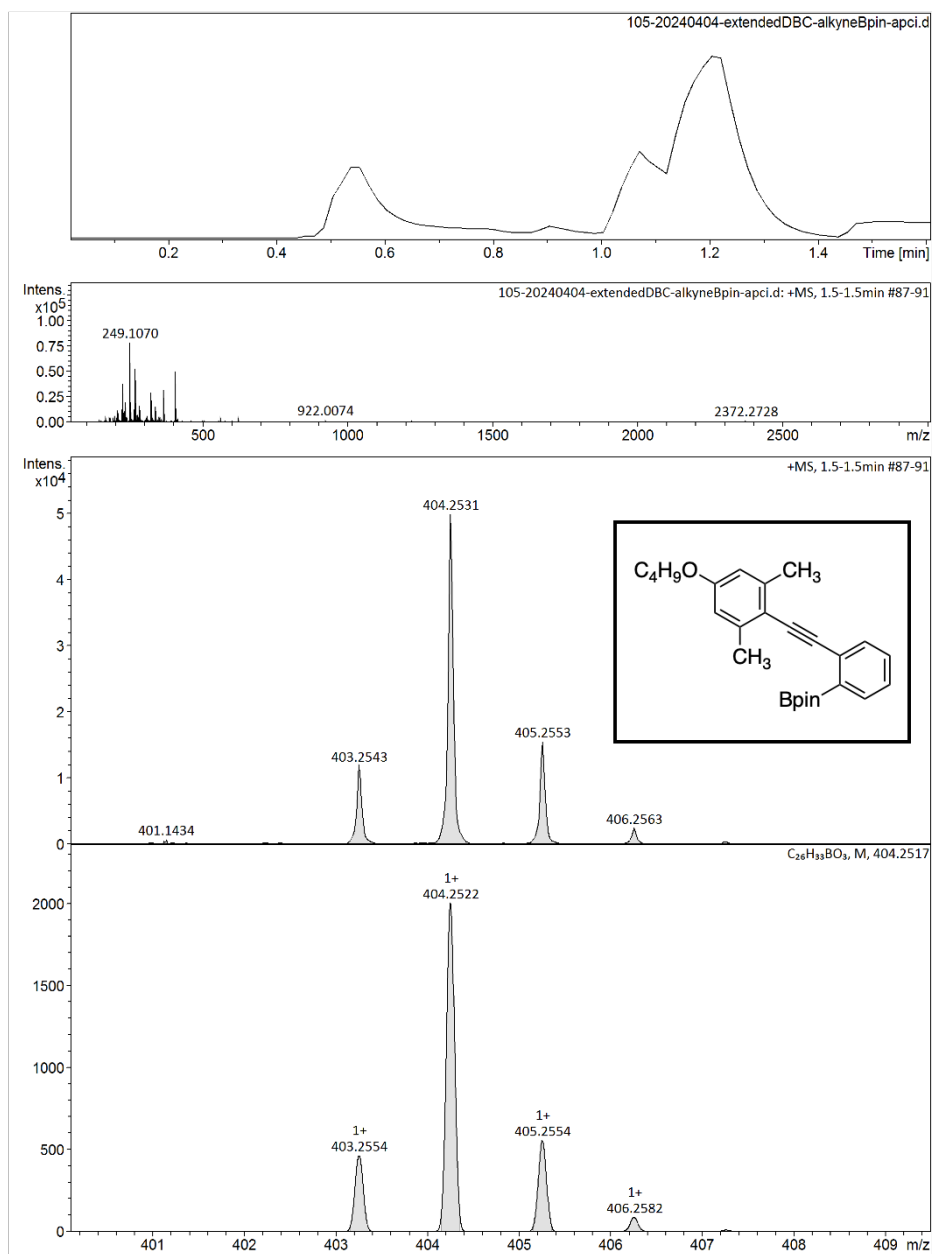

**Figure S11.** APCI-TOF mass spectrum of S2.





# Generic Display Report (all)

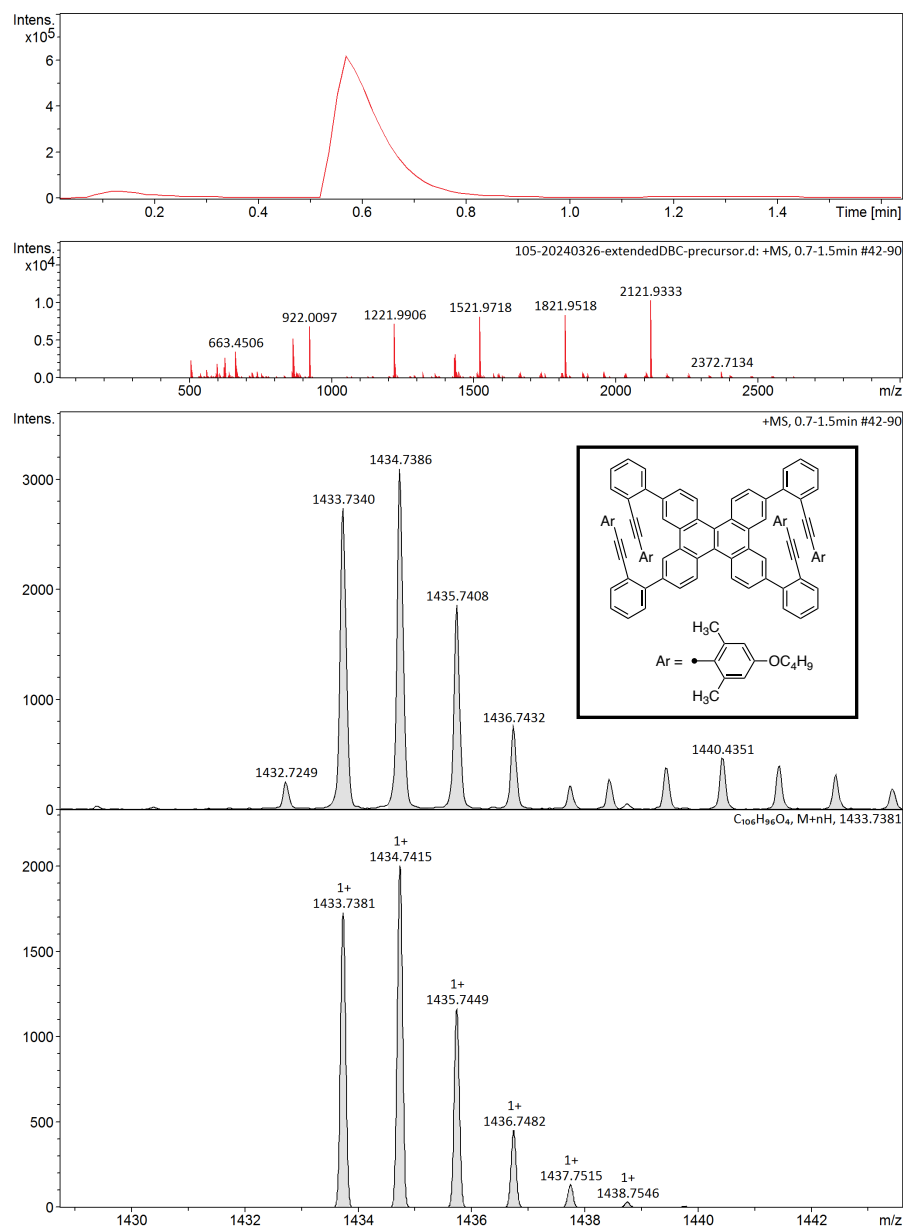

**Figure S12.** APCI-TOF mass spectrum of **4**.

## Generic Display Report (all)

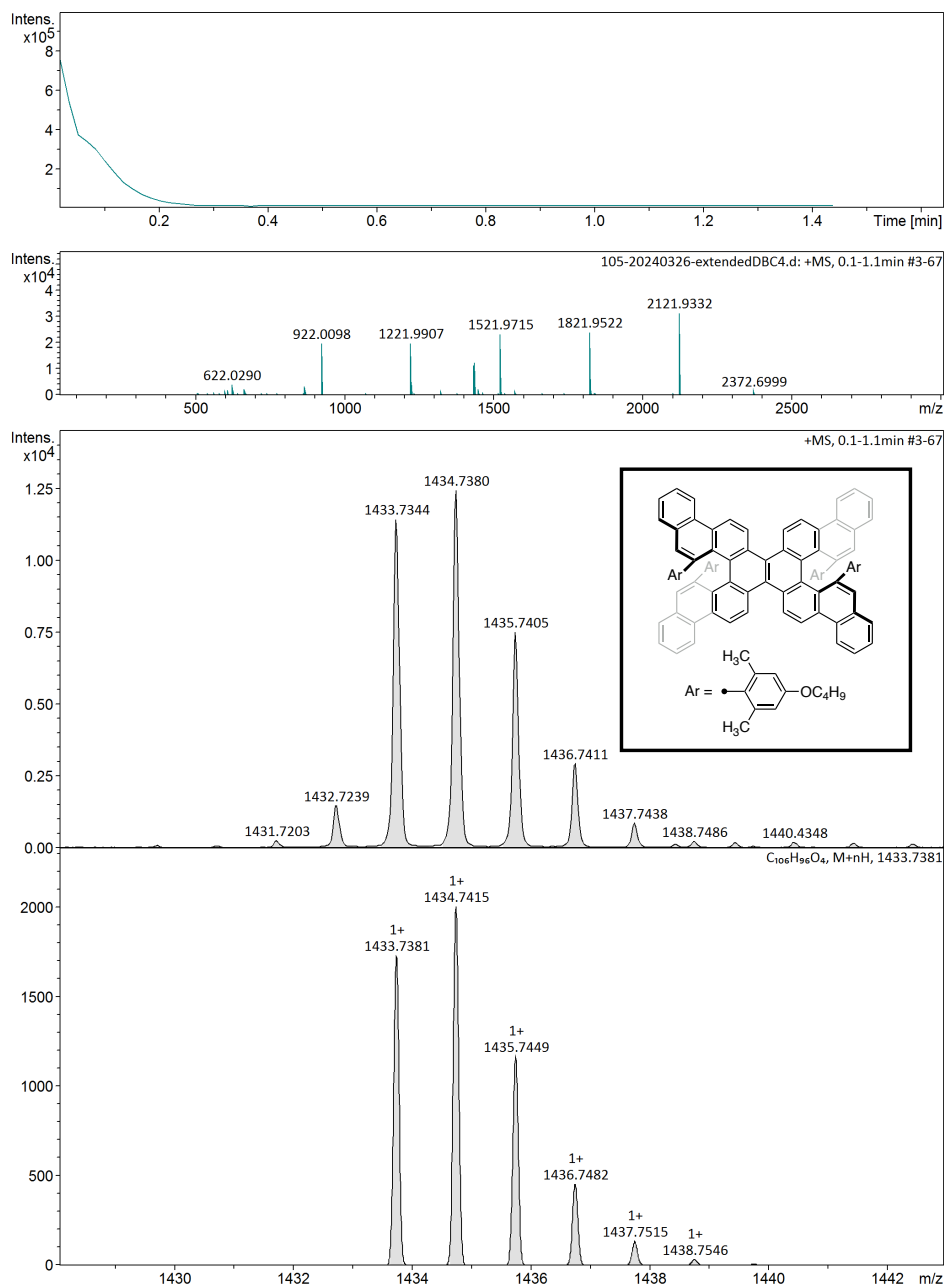

Figure S13. APCI-TOF mass spectrum of 1.



## 5. Crystal data

---

**Table S1.** Crystallographic data of **1**

| compound                                           | <b>1</b>                                                            |
|----------------------------------------------------|---------------------------------------------------------------------|
| Formula                                            | C <sub>106</sub> H <sub>96</sub> O <sub>4</sub> , CHCl <sub>3</sub> |
| Formula weight                                     | 1553.19                                                             |
| Crystal system                                     | triclinic                                                           |
| Space group                                        | <i>P</i> -1 (No. 2)                                                 |
| Crystal color                                      | yellow                                                              |
| Crystal description                                | block                                                               |
| <i>a</i> [Å]                                       | 10.8817(3)                                                          |
| <i>b</i> [Å]                                       | 15.6692(4)                                                          |
| <i>c</i> [Å]                                       | 25.2074(6)                                                          |
| $\alpha$ [°]                                       | 92.731(2)                                                           |
| $\beta$ [°]                                        | 92.591(2)                                                           |
| $\gamma$ [°]                                       | 108.886(2)                                                          |
| <i>V</i> [Å <sup>3</sup> ]                         | 4061.44(19)                                                         |
| <i>Z</i>                                           | 2                                                                   |
| <i>d</i> <sub>calcd</sub> [g cm <sup>-3</sup> ]    | 1.270                                                               |
| <i>R</i> <sub>1</sub> ( <i>I</i> > 2σ( <i>I</i> )) | 0.0739                                                              |
| <i>wR</i> <sub>2</sub> (all data)                  | 0.2077                                                              |
| Goodness-of-fit                                    | 1.005                                                               |
| Temperature [K]                                    | 93                                                                  |
| Solvent                                            | CHCl <sub>3</sub> /MeOH                                             |
| CCDC No.                                           | 2345868                                                             |

---

## 6. Resolution and inversion dynamics

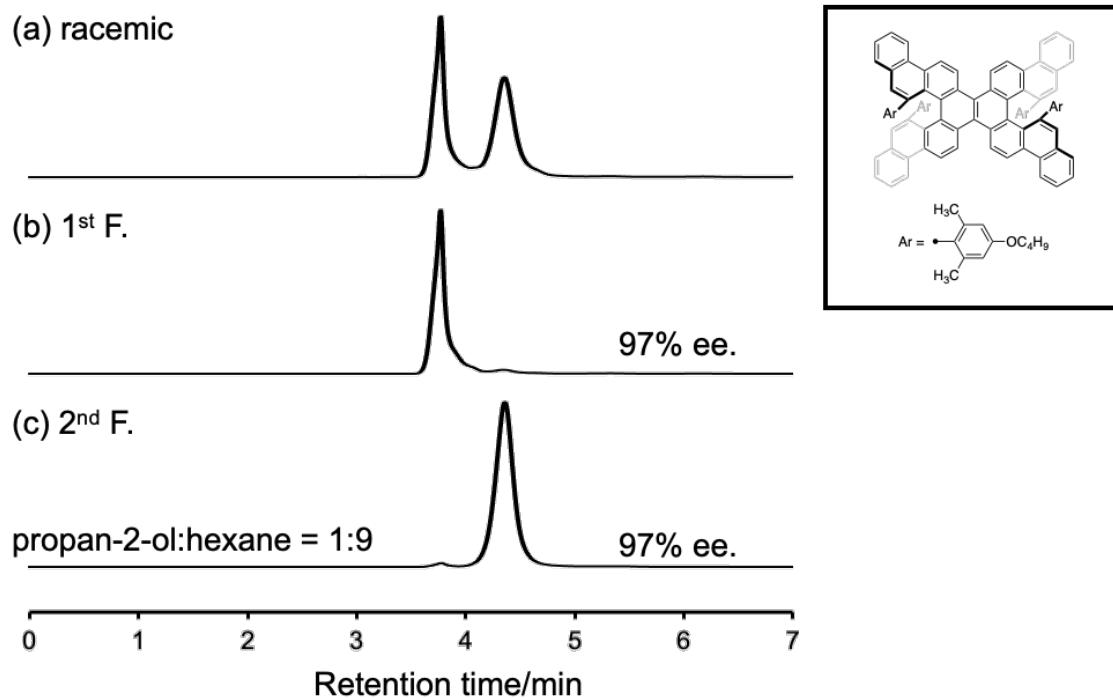

Figure S14. HPLC charts of (a) racemic **1**, (b) 1<sup>st</sup> fraction, and (c) 2<sup>nd</sup> fraction.

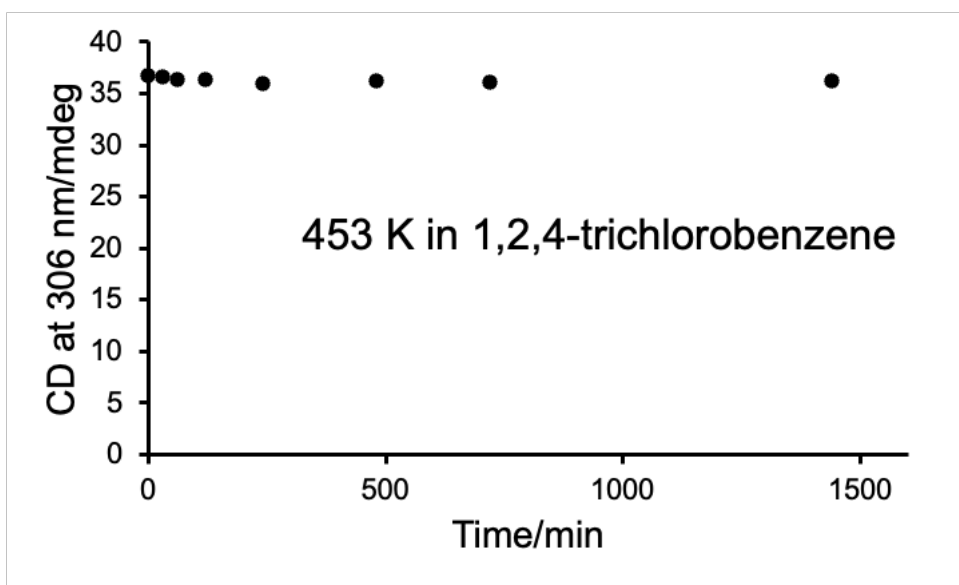

Figure S15. Plots of CD intensities of (*M,M*)-**1** at 306 nm versus time.

## 7. Cyclic voltammograms

---

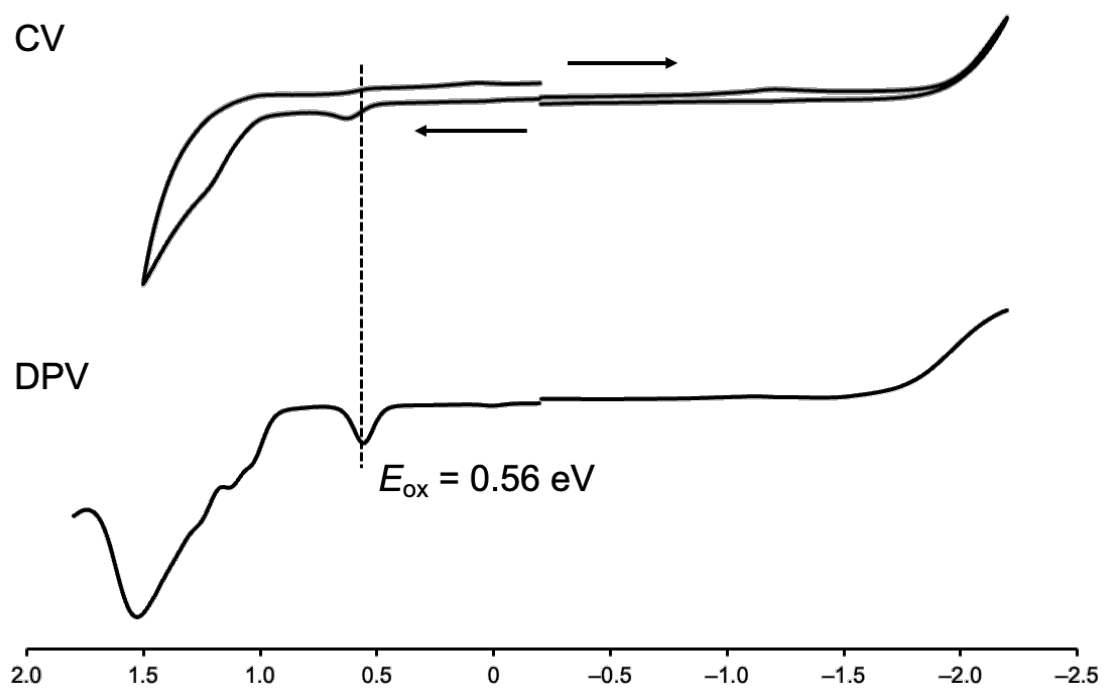

Figure S16. Cyclic and differential pulse voltammograms of 1.

## 8. DFT Calculations

---

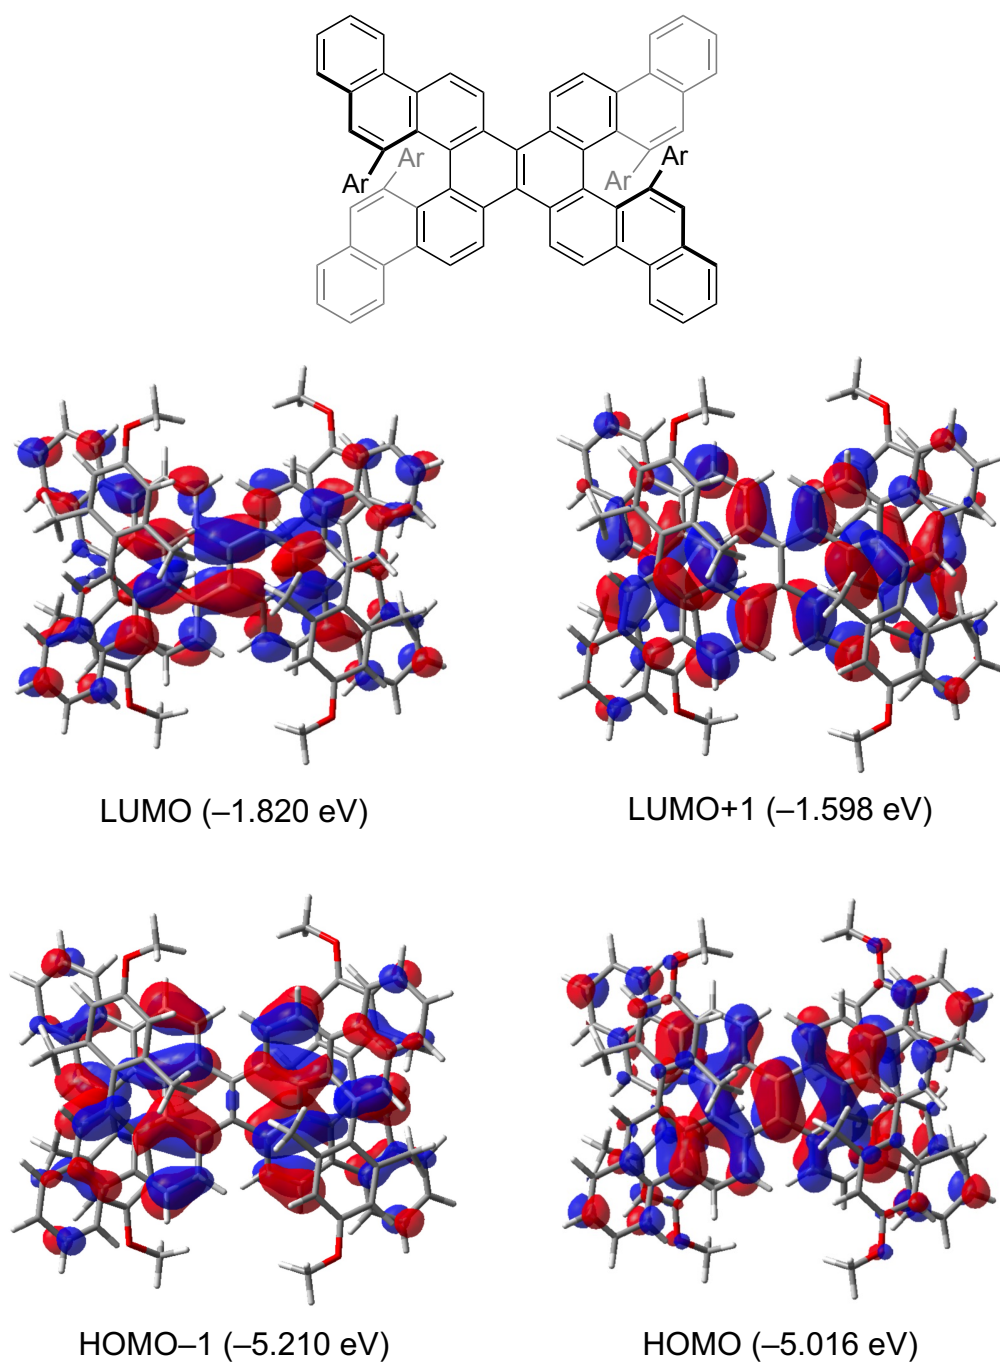

**Figure S17.** Calculated molecular orbitals of **1** (isovalue = 0.02).



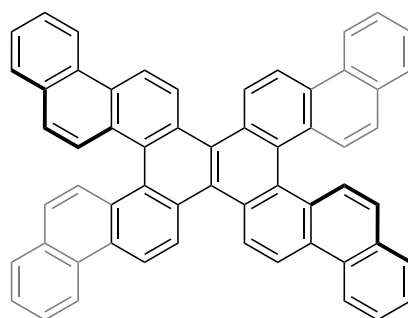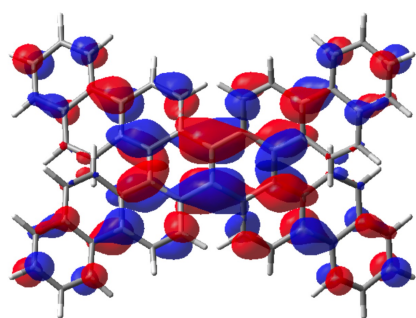

LUMO (-1.804 eV)

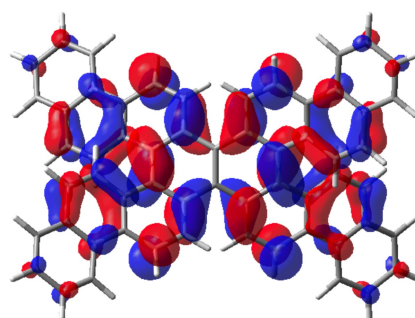

LUMO+1 (-1.513 eV)

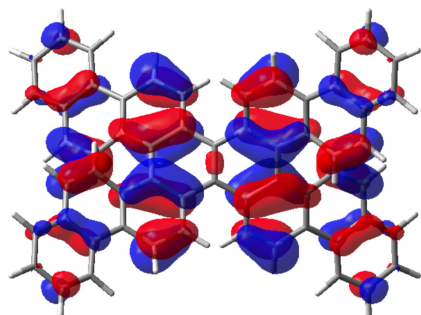

HOMO-1 (-5.428 eV)

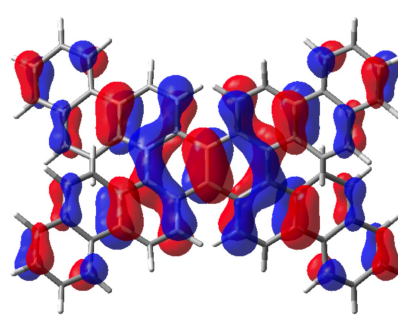

HOMO (-5.179 eV)

**Figure S18.** Calculated molecular orbitals of **1'** (isovalue = 0.02).

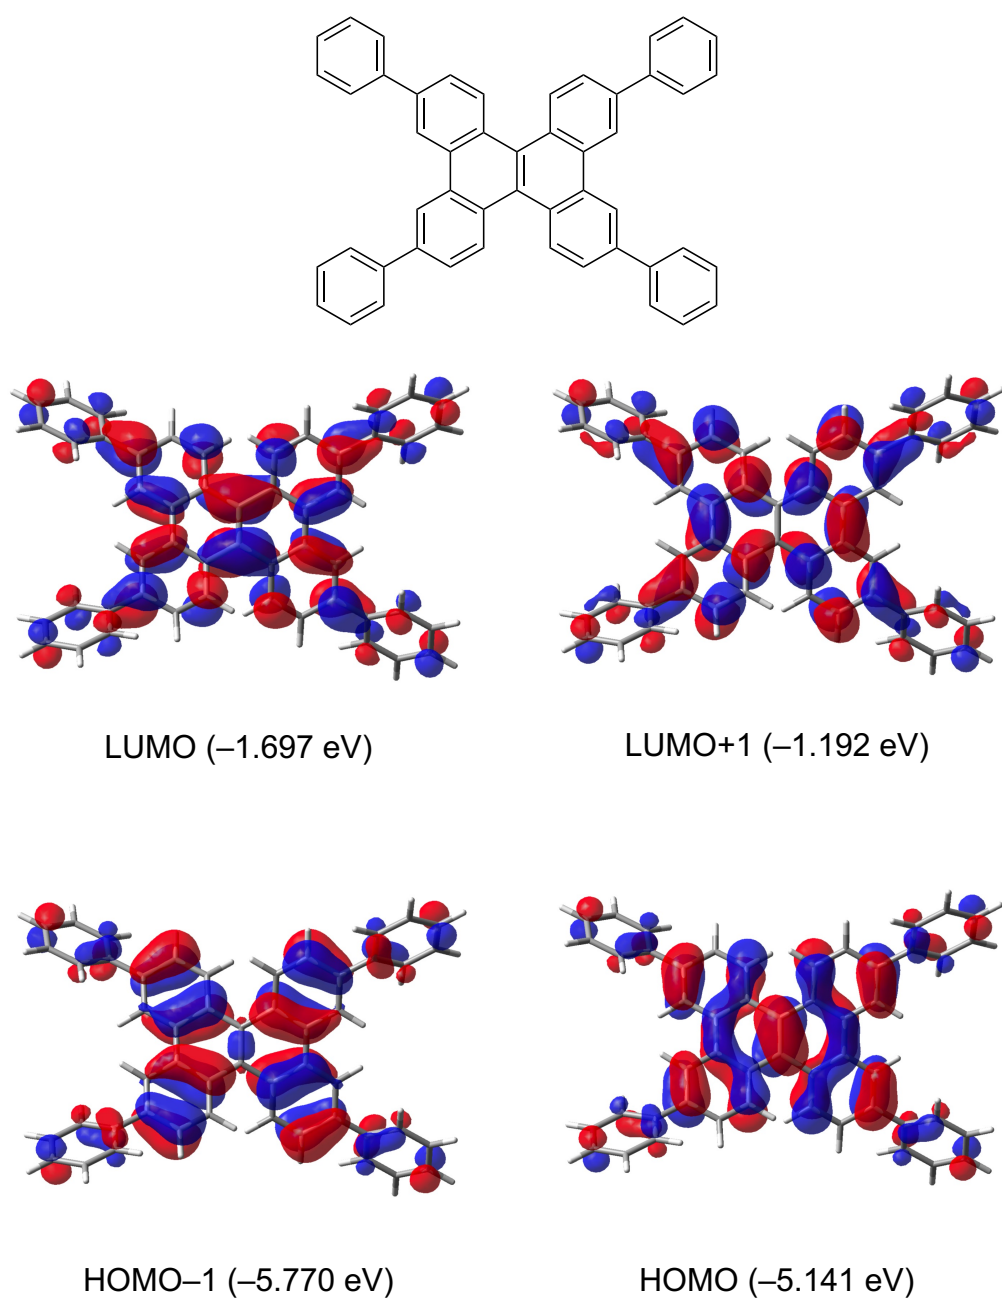

**Figure S19.** Calculated molecular orbitals of 4' (isovalue = 0.02).

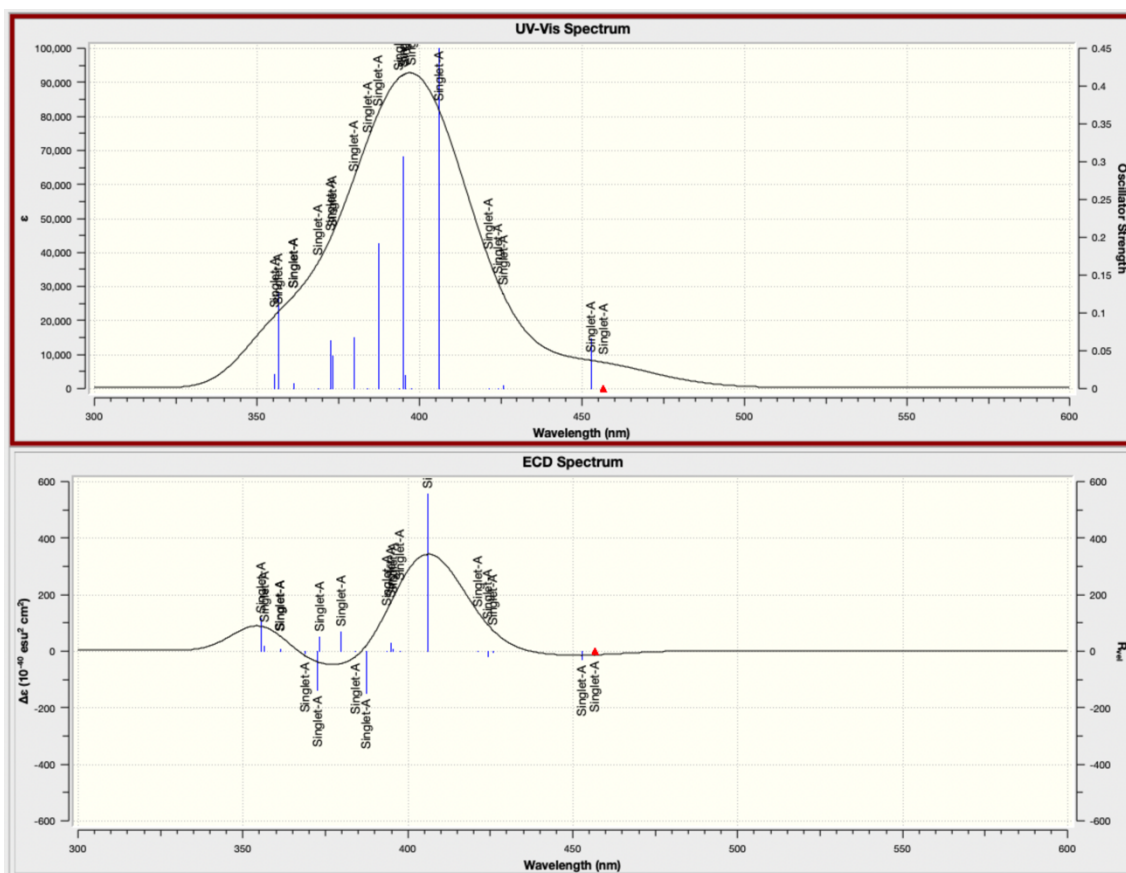

**Figure S20.** Simulated absorption (top) and CD (bottom) spectra of **4**.

**Table S2.** Cartesian coordinate and geometry of  $(M,M)$ -1.

|   |           |           |           |   |           |           |           |
|---|-----------|-----------|-----------|---|-----------|-----------|-----------|
| O | 3.799334  | -5.482375 | 2.609181  | C | -3.148151 | -1.829086 | -2.724174 |
| O | -3.79979  | -5.482181 | -2.609279 | C | -2.135803 | -0.890448 | -3.344979 |
| O | -3.799943 | 5.482257  | 2.609072  | C | 2.135951  | 0.890718  | -3.344727 |
| C | 2.442716  | -0.614929 | -0.387149 | C | -5.220462 | 2.306899  | 1.535224  |
| C | 1.262871  | -2.677962 | -0.920848 | C | 6.888396  | -2.531691 | -3.422863 |
| C | 1.237748  | -1.366236 | -0.376552 | C | 7.066934  | -3.887066 | -3.615698 |
| C | 3.584029  | -2.411572 | -1.61308  | C | 2.971128  | -3.202932 | 2.943861  |
| C | -1.237808 | 1.366298  | -0.376354 | C | -4.964963 | -4.331081 | 2.493898  |
| C | -2.442785 | -0.61492  | 0.387111  | C | -4.754261 | 2.947213  | -2.284099 |
| C | 4.754274  | -2.947059 | -2.284242 | C | 1.262967  | 2.677939  | 0.920898  |
| C | 2.423332  | -3.206479 | -1.426762 | C | -5.220351 | -2.306838 | -1.535463 |
| C | -1.23784  | -1.366255 | 0.376422  | C | -5.745668 | 2.039523  | -2.748951 |
| C | -0.00003  | -0.704065 | -0.000024 | C | -7.066998 | -3.887116 | 3.61563   |
| C | 1.237791  | 1.366212  | 0.376603  | C | 3.148338  | 1.829292  | -2.723885 |
| C | -2.442765 | 0.614971  | -0.387094 | C | -2.971311 | -3.202833 | -2.943895 |
| C | -3.539401 | -1.04092  | 1.22112   | C | 2.423458  | 3.206419  | 1.426787  |
| C | -0.000019 | 0.704076  | 0.000085  | C | -5.525129 | 0.639775  | -2.577975 |
| C | 3.539379  | 1.040787  | 1.221212  | C | 5.220513  | 2.306887  | -1.535079 |
| C | 3.539355  | -1.040893 | -1.22117  | C | -2.135876 | 0.89057   | 3.344758  |
| C | -4.485888 | -0.11789  | 1.848074  | C | 6.494989  | 1.896274  | -0.830458 |
| C | 2.135902  | -0.890465 | 3.345036  | C | -5.017847 | -3.666438 | -1.764656 |
| C | -2.42345  | -3.206555 | 1.426508  | C | -6.098232 | -4.792447 | 3.138746  |
| C | -1.262948 | 2.678088  | -0.920475 | C | 4.259013  | 1.365396  | -1.982708 |
| C | 5.745791  | -2.039363 | -2.748859 | C | -2.971443 | 3.202904  | 2.943658  |
| C | 2.44273   | 0.61486   | 0.387193  | C | -3.893696 | -4.125905 | -2.453843 |
| C | -4.754327 | -2.947114 | 2.284162  | C | 6.888614  | 2.531495  | 3.422645  |
| C | 4.964888  | -4.331025 | -2.493996 | C | -5.017986 | 3.66651   | 1.764441  |
| C | 5.220178  | -2.307181 | 1.535301  | C | 4.965168  | 4.330884  | 2.493757  |
| C | -4.258976 | 1.365345  | 1.982788  | C | -6.494816 | -1.896232 | -0.830844 |
| C | -1.262987 | -2.678028 | 0.920586  | C | -6.494931 | 1.896344  | 0.830565  |
| C | 3.584127  | 2.411472  | 1.613081  | C | -3.893849 | 4.125981  | 2.453625  |
| C | -3.539351 | 1.040981  | -1.22113  | O | 3.800068  | 5.482364  | -2.60872  |
| C | 4.258801  | -1.365509 | 1.982898  | C | -4.964964 | 4.331197  | -2.493646 |
| C | 4.485852  | 0.117702  | 1.848123  | C | -6.888254 | 2.531866  | -3.422975 |
| C | -3.584102 | -2.411628 | 1.612958  | C | -7.066886 | 3.887259  | -3.615597 |
| C | -3.584046 | 2.411706  | -1.612898 | C | 7.067266  | 3.886876  | 3.615337  |
| C | 5.745922  | 2.039186  | 2.748777  | C | 6.09852   | 4.792237  | 3.138473  |
| C | 3.893379  | -4.126106 | 2.453757  | C | 5.018065  | 3.666535  | -1.764195 |
| C | 4.754444  | 2.946914  | 2.284148  | C | -6.098218 | 4.792586  | -3.138509 |
| C | -5.525322 | -0.639679 | 2.577759  | C | 2.971555  | 3.203039  | -2.943517 |
| C | 5.52534   | 0.639448  | 2.577761  | C | 3.893968  | 4.126063  | -2.45338  |
| C | 4.485885  | -0.117845 | -1.848026 | H | 0.347445  | -3.253774 | -0.980198 |
| C | -5.745814 | -2.039423 | 2.748845  | H | 2.408902  | -4.221213 | -1.808691 |
| C | 5.017545  | -3.666759 | 1.764512  | H | 1.599373  | -1.391862 | 4.156928  |
| C | 3.148114  | -1.829197 | 2.724145  | H | 1.38761   | -0.553062 | 2.618811  |
| C | 5.525331  | -0.63963  | -2.577709 | H | 2.610792  | 0.005783  | 3.755703  |
| C | -4.258834 | -1.365276 | -1.982989 | H | -2.409024 | -4.22134  | 1.808301  |
| C | -6.88843  | -2.531741 | 3.422838  | H | -0.347543 | 3.253945  | -0.979717 |
| C | -4.485763 | 0.117958  | -1.848214 | H | 4.248248  | -5.051297 | -2.113729 |
| C | -3.148278 | 1.829164  | 2.723961  | H | -0.347585 | -3.253886 | 0.979849  |
| C | 6.494649  | -1.89675  | 0.83058   | H | -6.190423 | 0.04238   | 3.100997  |
| C | 6.098158  | -4.792398 | -3.138841 | H | 6.190402  | -0.042628 | 3.101027  |
| C | -2.423405 | 3.206633  | -1.426395 | H | 5.7388    | -4.39693  | 1.409531  |

|   |           |           |           |
|---|-----------|-----------|-----------|
| H | 6.190467  | 0.042439  | -3.100886 |
| H | -7.62912  | -1.821061 | 3.78211   |
| H | 6.92018   | -2.743422 | 0.284183  |
| H | 6.329316  | -1.086176 | 0.119368  |
| H | 7.255417  | -1.552472 | 1.542953  |
| H | 6.243796  | -5.860899 | -3.272906 |
| H | -2.408983 | 4.221426  | -1.808169 |
| H | -1.599204 | -1.391903 | -4.156791 |
| H | -2.610569 | 0.00583   | -3.755715 |
| H | -1.387573 | -0.553105 | -2.61866  |
| H | 1.599638  | 1.392121  | -4.156762 |
| H | 2.610616  | -0.00574  | -3.755168 |
| H | 1.387477  | 0.553692  | -2.618503 |
| H | 7.629118  | -1.821028 | -3.782106 |
| H | 7.95205   | -4.256374 | -4.126452 |
| H | 2.111283  | -3.527823 | 3.519512  |
| H | -4.248342 | -5.051373 | 2.113635  |
| H | 0.34756   | 3.25378   | 0.980268  |
| H | -7.952125 | -4.256435 | 4.126355  |
| H | -2.111483 | -3.527833 | -3.519511 |
| H | 2.409084  | 4.221156  | 1.808716  |
| H | -6.190129 | -0.042263 | -3.101369 |
| H | -1.387187 | 0.553883  | 2.618593  |
| H | -1.599821 | 1.391845  | 4.157047  |
| H | -2.610466 | -0.006073 | 3.754867  |
| H | 7.255754  | 1.552197  | -1.542947 |
| H | 6.920515  | 2.742814  | -0.283859 |
| H | 6.329679  | 1.085507  | -0.119466 |
| H | -5.739205 | -4.396533 | -1.409729 |
| H | -6.243876 | -5.860949 | 3.272801  |
| H | -2.111574 | 3.527928  | 3.519203  |
| H | 7.629312  | 1.820811  | 3.781896  |

|   |           |           |           |
|---|-----------|-----------|-----------|
| H | -5.739366 | 4.396577  | 1.409496  |
| H | 4.248548  | 5.05116   | 2.113458  |
| H | -7.255217 | -1.551085 | -1.543177 |
| H | -6.920916 | -2.743039 | -0.285108 |
| H | -6.329244 | -1.086198 | -0.119064 |
| H | -6.920066 | 2.742729  | 0.283411  |
| H | -6.329753 | 1.085139  | 0.120047  |
| H | -7.25595  | 1.55292   | 1.543089  |
| H | -4.248415 | 5.051469  | -2.113205 |
| H | -7.628881 | 1.821196  | -3.782399 |
| H | -7.951994 | 4.25659   | -4.126346 |
| H | 7.952455  | 4.256171  | 4.125973  |
| H | 6.244251  | 5.860738  | 3.272431  |
| H | 5.739427  | 4.396562  | -1.409143 |
| H | -6.243929 | 5.861098  | -3.272405 |
| H | 2.111745  | 3.52811   | -3.519119 |
| C | 2.689764  | 5.997461  | -3.322134 |
| H | 2.670058  | 5.636711  | -4.359393 |
| H | 1.739177  | 5.737645  | -2.836481 |
| H | 2.809154  | 7.082891  | -3.321753 |
| C | -2.689544 | 5.997321  | 3.322351  |
| H | -2.669686 | 5.636514  | 4.35959   |
| H | -1.739022 | 5.737534  | 2.836553  |
| H | -2.808936 | 7.082751  | 3.32205   |
| C | 2.688835  | -5.997327 | 3.322392  |
| H | 2.669032  | -5.636639 | 4.359675  |
| H | 1.738368  | -5.737307 | 2.836615  |
| H | 2.808034  | -7.082777 | 3.321966  |
| C | -2.689379 | -5.997229 | -3.322554 |
| H | -2.669572 | -5.636483 | -4.359816 |
| H | -1.738861 | -5.737354 | -2.836797 |
| H | -2.80871  | -7.082665 | -3.32218  |

Negative frequency = zero

Sum of electronic and thermal free energies = -3925.061731 Hartree

**Table S3.** Cartesian coordinate and geometry of (*P,M*)-1.

|   |           |           |           |   |           |           |           |
|---|-----------|-----------|-----------|---|-----------|-----------|-----------|
| O | -3.903544 | 4.948751  | 3.521167  | H | -5.839868 | 4.067392  | 2.158761  |
| C | -2.427785 | 0.646406  | -0.317348 | H | -6.252704 | 0.50944   | -3.006386 |
| C | -1.291378 | 2.781954  | -0.497406 | H | -7.003548 | 2.631649  | 0.758318  |
| C | -1.20349  | 1.362467  | -0.380326 | H | -6.414419 | 1.026031  | 0.315552  |
| C | -3.639921 | 2.645827  | -1.100859 | H | -7.328741 | 1.248549  | 1.804389  |
| C | -4.8157   | 3.293422  | -1.645854 | H | -6.318819 | 6.335393  | -2.069944 |
| C | -2.48956  | 3.400875  | -0.730274 | H | -1.74874  | -0.636212 | -4.399522 |
| C | -1.203472 | -1.362522 | 0.380393  | H | -2.625246 | 0.667542  | -3.584644 |
| C | -3.577295 | -1.227393 | 0.996819  | H | -1.363603 | -0.217695 | -2.730038 |
| C | -3.577293 | 1.227321  | -0.99678  | H | -7.695248 | 2.456897  | -3.31918  |
| C | -2.186781 | 0.324575  | 3.445513  | H | -8.030238 | 4.911657  | -3.195752 |
| C | -5.806872 | 2.485234  | -2.271361 | H | -2.192078 | 2.882517  | 4.06824   |
| C | -2.427776 | -0.646478 | 0.317399  | H | -0.404253 | -3.378762 | 0.318167  |
| C | -5.031481 | 4.693209  | -1.597371 | H | -2.526986 | -4.483928 | 0.735231  |
| C | -5.294104 | 1.99673   | 1.906539  | H | -7.328495 | -1.248702 | -1.80449  |
| C | -3.63991  | -2.6459   | 1.100906  | H | -7.00337  | -2.632027 | -0.758696 |
| C | -4.31732  | 1.001289  | 2.172213  | H | -6.414237 | -1.02651  | -0.315566 |
| C | -4.53172  | -0.434099 | 1.765106  | H | -7.695199 | -2.457045 | 3.3193    |
| C | -5.80685  | -2.485343 | 2.271431  | H | -4.311307 | -5.336972 | 1.104094  |
| C | -3.983196 | 3.640127  | 3.128332  | H | -8.030182 | -4.911808 | 3.195795  |
| C | -4.815688 | -3.293509 | 1.645884  | H | -6.318822 | -6.33549  | 2.069838  |
| C | -5.582562 | -1.082425 | 2.37117   | H | -5.839422 | -4.067576 | -2.15906  |
| C | -4.531684 | 0.434016  | -1.765095 | H | -2.191692 | -2.882236 | -4.068373 |
| C | -5.106506 | 3.295803  | 2.373657  | C | -2.800891 | -5.338803 | -4.321611 |
| C | -3.211592 | 1.33999   | 2.985329  | H | -2.781034 | -4.79794  | -5.277398 |
| C | -5.582559 | 1.082319  | -2.371118 | H | -1.845646 | -5.179919 | -3.802748 |
| C | -6.573576 | 1.706475  | 1.152614  | H | -2.932355 | -6.405406 | -4.515459 |
| C | -6.170394 | 5.260929  | -2.136174 | C | -2.801544 | 5.339034  | 4.321341  |
| C | -2.186656 | -0.324337 | -3.445509 | H | -2.781674 | 4.798224  | 5.277158  |
| C | -6.955986 | 3.091234  | -2.835592 | H | -1.846261 | 5.180216  | 3.802527  |
| C | -7.141052 | 4.456421  | -2.768226 | H | -2.93312  | 6.405634  | 4.515127  |
| C | -3.050179 | 2.655563  | 3.444917  | C | 0.054575  | 0.658477  | -0.251132 |
| C | -1.29135  | -2.78201  | 0.497496  | C | 1.305979  | 1.147017  | -0.835776 |
| C | -3.211383 | -1.33987  | -2.985396 | C | 0.054584  | -0.658513 | 0.251194  |
| C | -2.489529 | -3.400942 | 0.730365  | C | 2.50501   | 0.43347   | -0.582279 |
| C | -5.293855 | -1.996884 | -1.906695 | C | 1.34827   | 2.165655  | -1.82634  |
| C | -6.573366 | -1.706777 | -1.15278  | C | 1.305985  | -1.147002 | 0.835865  |
| C | -4.317165 | -1.001331 | -2.172283 | C | 2.505014  | -0.433472 | 0.582342  |
| C | -6.955949 | -3.091366 | 2.835673  | C | 3.602562  | 0.509456  | -1.514616 |
| C | -5.031476 | -4.693293 | 1.597331  | C | 2.511404  | 2.46039   | -2.4917   |
| O | -3.902963 | -4.948671 | -3.521462 | H | 0.44742   | 2.698438  | -2.098002 |
| C | -7.141014 | -4.45655  | 2.768257  | C | 1.348258  | -2.165595 | 1.826472  |
| C | -6.170379 | -5.261032 | 2.136136  | C | 3.602565  | -0.50944  | 1.514686  |
| C | -5.106122 | -3.295909 | -2.373887 | C | 4.539408  | -0.588402 | -1.756349 |
| C | -3.049831 | -2.655402 | -3.445058 | C | 3.661774  | 1.639817  | -2.381177 |
| C | -3.982757 | -3.640077 | -3.128554 | H | 2.501193  | 3.266041  | -3.217334 |
| H | -0.40428  | 3.378692  | -0.31803  | C | 2.511388  | -2.460323 | 2.491848  |
| H | -2.527043 | 4.483861  | -0.735099 | H | 0.447399  | -2.698341 | 2.098176  |
| H | -1.748827 | 0.636591  | 4.399463  | C | 3.661768  | -1.639769 | 2.381291  |
| H | -1.363762 | 0.217879  | 2.730013  | C | 4.539419  | 0.588422  | 1.756398  |
| H | -2.625317 | -0.667309 | 3.584796  | C | 4.306464  | -2.01481  | -1.331411 |
| H | -4.311287 | 5.336915  | -1.104208 | C | 5.580104  | -0.382619 | -2.628103 |
| H | -6.25271  | -0.509547 | 3.006435  | C | 4.832181  | 1.877947  | -3.205675 |

|   |          |           |           |
|---|----------|-----------|-----------|
| H | 2.50116  | -3.265948 | 3.217513  |
| C | 4.832156 | -1.877879 | 3.205819  |
| C | 4.306495 | 2.014821  | 1.331414  |
| C | 5.580104 | 0.382657  | 2.62817   |
| C | 3.193464 | -2.717331 | -1.846236 |
| C | 5.267733 | -2.725696 | -0.56862  |
| C | 5.812136 | 0.852347  | -3.305133 |
| H | 6.237845 | -1.215707 | -2.862014 |
| C | 5.053413 | 3.084557  | -3.911764 |
| C | 5.81212  | -0.852286 | 3.305251  |
| C | 5.053355 | -3.084458 | 3.911968  |
| C | 3.193474 | 2.717356  | 1.846176  |
| C | 5.267801 | 2.725689  | 0.568653  |
| H | 6.237852 | 1.215745  | 2.862059  |
| C | 2.179358 | -2.070095 | -2.764739 |
| C | 3.015428 | -4.075049 | -1.543453 |
| C | 5.064316 | -4.073784 | -0.28012  |
| C | 6.541762 | -2.083836 | -0.064428 |
| C | 6.955268 | 1.04905   | -4.115442 |
| C | 6.186954 | 3.263369  | -4.683945 |
| H | 4.344628 | 3.901098  | -3.823686 |
| C | 6.955237 | -1.048967 | 4.115584  |
| C | 6.186882 | -3.26325  | 4.684174  |
| H | 4.344555 | -3.900991 | 3.823921  |
| C | 2.17932  | 2.070153  | 2.764649  |
| C | 3.01545  | 4.075068  | 1.543352  |
| C | 5.064394 | 4.073765  | 0.280107  |
| C | 6.541852 | 2.083812  | 0.064543  |
| H | 1.440242 | -1.479893 | -2.210983 |
| H | 1.632617 | -2.834204 | -3.327    |
| H | 2.654035 | -1.395578 | -3.483919 |
| C | 3.938801 | -4.753718 | -0.749807 |

|   |          |           |           |
|---|----------|-----------|-----------|
| H | 2.153826 | -4.588566 | -1.956199 |
| H | 5.785393 | -4.622152 | 0.3188    |
| H | 6.964921 | -2.666841 | 0.758658  |
| H | 6.37618  | -1.066441 | 0.293314  |
| H | 7.304232 | -2.029838 | -0.852094 |
| C | 7.144791 | 2.235871  | -4.79497  |
| H | 7.687432 | 0.248206  | -4.188754 |
| H | 6.340962 | 4.205049  | -5.203911 |
| C | 7.144734 | -2.235763 | 4.795165  |
| H | 7.687416 | -0.248134 | 4.188871  |
| H | 6.340862 | -4.204907 | 5.204191  |
| H | 1.632641 | 2.83428   | 3.326949  |
| H | 2.653942 | 1.395565  | 3.483796  |
| H | 1.440157 | 1.480039  | 2.21086   |
| C | 3.938854 | 4.753711  | 0.749724  |
| H | 2.153832 | 4.588595  | 1.956053  |
| H | 5.785496 | 4.622117  | -0.318798 |
| H | 7.304272 | 2.02985   | 0.852261  |
| H | 6.965057 | 2.66679   | -0.758538 |
| H | 6.376297 | 1.066403  | -0.29317  |
| O | 3.844435 | -6.071778 | -0.394172 |
| H | 8.03012  | 2.381381  | -5.40794  |
| H | 8.030054 | -2.381255 | 5.408152  |
| O | 3.844504 | 6.071759  | 0.394043  |
| C | 2.729218 | -6.810992 | -0.858888 |
| C | 2.729272 | 6.81099   | 0.858694  |
| H | 2.702909 | -6.860662 | -1.955984 |
| H | 1.782088 | -6.386736 | -0.498312 |
| H | 2.847732 | -7.819332 | -0.456898 |
| H | 2.702917 | 6.860689  | 1.955787  |
| H | 1.782156 | 6.386728  | 0.498089  |
| H | 2.847807 | 7.819319  | 0.456682  |

Negative frequency = zero

Sum of electronic and thermal free energies = -3925.049495 Hartree

**Table S4.** Cartesian coordinate and geometry of 1'.

|   |           |           |           |   |           |           |           |
|---|-----------|-----------|-----------|---|-----------|-----------|-----------|
| C | 2.460155  | 0.642728  | 0.348321  | C | -5.951552 | 4.867618  | -3.319459 |
| C | 1.227303  | 2.665085  | 0.941498  | C | 6.970732  | -2.686506 | -3.219043 |
| C | 1.23972   | 1.366331  | 0.363485  | C | 4.828795  | -4.387726 | -2.670193 |
| C | 3.564851  | 2.490075  | 1.58902   | C | -4.828621 | -4.387763 | 2.670324  |
| C | -1.23972  | -1.366323 | 0.363501  | C | -6.970636 | -2.686599 | 3.219052  |
| C | -2.460176 | 0.642664  | -0.348403 | C | -7.032474 | -4.011165 | 3.603275  |
| C | 4.732432  | 3.033931  | 2.267165  | C | 7.032618  | -4.011087 | -3.603199 |
| C | 2.357712  | 3.224113  | 1.480653  | C | 5.951524  | -4.867607 | -3.319524 |
| C | -1.239762 | 1.366295  | -0.363585 | C | -5.951341 | -4.867651 | 3.319669  |
| C | -0.000008 | 0.699319  | -0.000053 | H | 0.291062  | 3.204417  | 1.015149  |
| C | 1.23976   | -1.366294 | -0.363576 | H | 2.286068  | 4.214493  | 1.915884  |
| C | -2.460157 | -0.642727 | 0.348328  | H | -2.286193 | 4.214425  | -1.915995 |
| C | -3.587436 | 1.158039  | -1.086227 | H | -0.291041 | -3.20438  | 1.015218  |
| C | 0.000008  | -0.699315 | -0.00005  | H | 4.020488  | 5.077518  | 2.451962  |
| C | 3.587438  | -1.15805  | -1.086216 | H | -0.291142 | 3.204389  | -1.015292 |
| C | 3.587385  | 1.15812   | 1.086177  | H | -6.577628 | 0.13907   | -2.425622 |
| C | -2.357809 | 3.224057  | -1.480728 | H | 6.577675  | -0.139108 | -2.425528 |
| C | -1.227287 | -2.665062 | 0.941544  | H | 6.577614  | 0.139202  | 2.42552   |
| C | 5.836712  | 2.17644   | 2.545247  | H | -7.799221 | 2.013211  | -3.426657 |
| C | 2.460174  | -0.642668 | -0.348398 | H | 5.999022  | 5.91395   | 3.609175  |
| C | -4.73256  | 3.033859  | -2.267122 | H | -2.286032 | -4.214448 | 1.915983  |
| C | 4.82865   | 4.387781  | 2.670265  | H | 7.799132  | 2.013313  | 3.426641  |
| C | -1.227374 | 2.665049  | -0.941605 | H | 7.910335  | 4.393377  | 4.116931  |
| C | 3.564933  | -2.490007 | -1.58905  | H | -4.020705 | 5.077491  | -2.451718 |
| C | -3.587383 | -1.158111 | 1.08619   | H | 0.291137  | -3.204395 | -1.015257 |
| C | -3.56494  | 2.490004  | -1.589043 | H | -7.910497 | 4.393303  | -4.116814 |
| C | -3.564837 | -2.49006  | 1.589057  | H | 2.28617   | -4.214421 | -1.915997 |
| C | 5.836814  | -2.176361 | -2.545225 | H | -6.577645 | -0.139216 | 2.425477  |
| C | 4.732543  | -3.033864 | -2.267142 | H | -5.999251 | 5.913925  | -3.608931 |
| C | -5.762621 | 0.803622  | -2.149004 | H | 7.799246  | -2.013229 | -3.42659  |
| C | 5.762649  | -0.80365  | -2.148944 | H | 4.02065   | -5.077474 | -2.451862 |
| C | -5.836806 | 2.176346  | -2.545252 | H | -4.020441 | -5.07749  | 2.45206   |
| C | 5.762578  | 0.803733  | 2.148936  | H | -7.799179 | -2.013344 | 3.426552  |
| C | -6.970719 | 2.686491  | -3.219075 | H | -7.910358 | -4.393396 | 4.116883  |
| C | 5.951361  | 4.867661  | 3.319632  | H | 7.910504  | -4.393308 | -4.116809 |
| C | -2.357692 | -3.224085 | 1.480715  | H | 5.999209  | -5.913904 | -3.609033 |
| C | 6.97061   | 2.686582  | 3.219099  | H | -5.998978 | -5.913931 | 3.609252  |
| C | 7.032463  | 4.011154  | 3.603296  | C | -4.702291 | 0.322523  | -1.443991 |
| C | -4.828827 | 4.387736  | -2.670117 | C | 4.702258  | 0.322622  | 1.443916  |
| C | -4.732423 | -3.033923 | 2.26719   | C | 4.702311  | -0.322544 | -1.443945 |
| C | 1.227369  | -2.665051 | -0.941592 | C | -4.702269 | -0.322623 | 1.443912  |
| C | -5.836725 | -2.176446 | 2.54523   | H | -4.676863 | 0.725351  | 1.174639  |
| C | -7.032616 | 4.011085  | -3.603191 | H | -4.676851 | -0.725461 | -1.174758 |
| C | 2.357796  | -3.224057 | -1.480726 | H | 4.676854  | -0.725351 | 1.17464   |
| C | -5.762598 | -0.803742 | 2.148913  | H | 4.676886  | 0.725435  | -1.174695 |

Negative frequency = zero

Sum of electronic and thermal free energies = -2228.931791 Hartree



**Table S5.** Cartesian coordinate and geometry of 1".

|   |           |           |           |
|---|-----------|-----------|-----------|
| C | -2.455702 | -0.628409 | 0.36966   |
| C | -1.240482 | -2.675946 | 0.91004   |
| C | -1.237901 | -1.362189 | 0.372314  |
| C | -3.60914  | -2.522103 | 1.447927  |
| C | 1.237908  | 1.362185  | 0.37234   |
| C | 2.455713  | -0.628428 | -0.369643 |
| C | -4.824139 | -3.146626 | 1.941294  |
| C | -2.401327 | -3.256968 | 1.348557  |
| C | 1.237906  | -1.362197 | -0.372308 |
| C | 0.000005  | -0.700266 | 0.000006  |
| C | -1.237883 | 1.362191  | -0.372328 |
| C | 2.45571   | 0.628406  | 0.369703  |
| C | 3.590944  | -1.137716 | -1.102732 |
| C | 0.00001   | 0.70026   | 0.000007  |
| C | -3.590903 | 1.137714  | -1.10281  |
| C | -3.590936 | -1.137701 | 1.102744  |
| C | 4.683798  | -0.303869 | -1.591243 |
| C | 2.401311  | -3.256963 | -1.348606 |
| C | 1.240477  | 2.675935  | 0.910079  |
| C | -5.948749 | -2.322776 | 2.221741  |
| C | -2.45569  | 0.62842   | -0.369694 |
| C | 4.824108  | -3.146611 | -1.941408 |
| C | -4.959114 | -4.542501 | 2.133708  |
| C | -5.665925 | -2.014935 | -1.484673 |
| C | 4.585254  | 1.173123  | -1.790764 |
| C | 1.240475  | -2.675944 | -0.910057 |
| C | -3.609088 | 2.522112  | -1.448009 |
| C | 3.590929  | 1.137691  | 1.102813  |
| C | -4.585237 | -1.173099 | -1.79094  |
| C | -4.683766 | 0.303884  | -1.591336 |
| C | 3.609129  | -2.522104 | -1.447971 |
| C | 3.609122  | 2.522087  | 1.448021  |
| C | -5.948688 | 2.322797  | -2.221855 |
| C | -4.509042 | -3.920302 | -2.422921 |
| C | -4.824072 | 3.146639  | -1.941406 |
| C | 5.807003  | -0.908974 | -2.098387 |
| C | -5.806987 | 0.909015  | -2.098417 |
| C | -4.683797 | -0.303868 | 1.591271  |
| C | 5.948709  | -2.322752 | -2.22187  |
| C | -5.628336 | -3.374372 | -1.794023 |
| C | -3.465827 | -1.735611 | -2.427512 |
| C | -5.807029 | -0.908993 | 2.098331  |
| C | 4.585257  | -1.173138 | 1.790893  |
| C | 7.149471  | -2.904757 | -2.692821 |
| C | 4.683789  | 0.303851  | 1.591326  |
| C | 3.46567   | 1.735684  | -2.426985 |
| C | -6.145723 | -5.093387 | 2.582555  |
| C | 2.401311  | 3.256952  | 1.348634  |
| C | 3.46586   | -1.735662 | 2.427475  |
| C | 5.666049  | 2.014921  | -1.484773 |
| C | -7.149532 | -2.904796 | 2.692618  |
| C | -7.252112 | -4.269921 | 2.869753  |
| C | -3.428492 | -3.093567 | -2.738633 |
| C | 4.95907   | -4.542478 | -2.133891 |
| C | 4.82411   | 3.146602  | 1.941424  |
| C | -1.240441 | 2.675943  | -0.910066 |
| C | 5.665931  | -2.014971 | 1.484569  |
| C | 5.948721  | 2.32275   | 2.22187   |
| C | 7.252038  | -4.269875 | -2.87002  |
| C | -3.465798 | 1.735596  | 2.427431  |
| C | 3.428525  | -3.093627 | 2.738557  |
| C | -2.401271 | 3.256969  | -1.348619 |
| C | 5.807013  | 0.90897   | 2.098416  |
| C | -5.665958 | 2.014957  | 1.484748  |
| C | 5.628341  | -3.374418 | 1.793879  |
| C | 6.145658  | -5.093349 | -2.582811 |
| C | -4.58525  | 1.173109  | 1.790912  |
| C | 3.428272  | 3.093654  | -2.738036 |
| C | 4.509061  | -3.92036  | 2.422791  |
| C | -7.149459 | 2.904823  | -2.692756 |
| C | 5.6284    | 3.374371  | -1.79406  |
| C | -4.95903  | 4.542512  | -2.133843 |
| C | 4.508934  | 3.920352  | -2.422607 |
| C | 4.959079  | 4.542474  | 2.133867  |
| C | 7.149494  | 2.904765  | 2.692779  |
| C | 7.252065  | 4.269887  | 2.869946  |
| C | -7.252021 | 4.269947  | -2.869914 |
| C | -6.145627 | 5.093405  | -2.582714 |
| C | -5.628346 | 3.374383  | 1.794144  |
| C | 6.145679  | 5.093355  | 2.582745  |
| C | -3.428438 | 3.093541  | 2.738595  |
| C | -4.509008 | 3.920289  | 2.422985  |
| H | -0.308363 | -3.219318 | 1.001775  |
| H | -2.364554 | -4.275998 | 1.71664   |
| H | 2.364524  | -4.27598  | -1.716722 |
| H | 0.308356  | 3.219307  | 1.001799  |
| H | -4.133831 | -5.205634 | 1.89836   |
| H | 0.308352  | -3.219307 | -1.001801 |
| H | 6.599182  | -0.285467 | -2.504332 |
| H | -6.599177 | 0.285528  | -2.504371 |
| H | -6.472537 | -4.007328 | -1.53387  |
| H | -6.599216 | -0.285503 | 2.504286  |
| H | 7.992949  | -2.254586 | -2.913362 |
| H | -6.22467  | -6.169691 | 2.710006  |
| H | 2.364529  | 4.275977  | 1.716728  |
| H | -7.993017 | -2.254632 | 2.913152  |
| H | -8.179848 | -4.708947 | 3.22648   |
| H | -2.555463 | -3.504502 | -3.239453 |
| H | 4.133794  | -5.205618 | -1.898538 |
| H | -0.308316 | 3.219307  | -1.001785 |
| H | 8.179757  | -4.708889 | -3.226806 |
| H | 2.555507  | -3.504572 | 3.239389  |
| H | -2.364483 | 4.275995  | -1.716711 |
| H | 6.599201  | 0.285475  | 2.50436   |
| H | 6.47253   | -4.007372 | 1.533682  |
| H | 6.224595  | -6.169647 | -2.710313 |

|   |           |          |           |
|---|-----------|----------|-----------|
| H | 2.555104  | 3.50463  | -3.23858  |
| H | -7.992948 | 2.254665 | -2.91329  |
| H | 6.472691  | 4.007298 | -1.534129 |
| H | -4.133743 | 5.20564  | -1.898492 |
| H | 4.133799  | 5.205609 | 1.898515  |
| H | 7.992978  | 2.2546   | 2.913311  |
| H | 8.179794  | 4.708908 | 3.226698  |
| H | -8.179748 | 4.708977 | -3.226661 |
| H | -6.22456  | 6.169707 | -2.710182 |
| H | -6.472563 | 4.00735  | 1.534071  |
| H | 6.22462   | 6.169656 | 2.710218  |
| H | -2.555374 | 3.504457 | 3.23937   |

|   |           |           |           |
|---|-----------|-----------|-----------|
| H | -4.4782   | 4.979174  | 2.665971  |
| H | -6.532323 | 1.601944  | 0.976802  |
| H | -2.627983 | 1.098752  | 2.694813  |
| H | -2.628029 | -1.09878  | -2.694973 |
| H | -4.478253 | -4.979196 | -2.665873 |
| H | -6.532253 | -1.601904 | -0.976679 |
| H | 2.627776  | 1.098881  | -2.694218 |
| H | 4.478096  | 4.979256  | -2.665505 |
| H | 6.532518  | 1.601848  | -0.977055 |
| H | 6.532248  | -1.601931 | 0.976564  |
| H | 4.478271  | -4.979261 | 2.66571   |
| H | 2.628073  | -1.098834 | 2.69498   |

Negative frequency = zero

Sum of electronic and thermal free energies = -3152.800807 Hartree

**Table S6.** Cartesian coordinate and geometry of 4'.

|   |           |           |           |   |           |           |           |
|---|-----------|-----------|-----------|---|-----------|-----------|-----------|
| C | -2.486832 | -0.691929 | 0.231359  | C | 6.192621  | -4.775312 | -3.009484 |
| C | -1.268883 | -2.702543 | 0.83869   | C | -7.331569 | 3.704492  | -1.172904 |
| C | -1.248974 | -1.391375 | 0.303649  | C | -5.000365 | 4.162858  | -2.62676  |
| C | -3.68371  | -2.653295 | 1.104422  | C | 5.000257  | 4.162466  | 2.6275    |
| C | 1.248979  | 1.391331  | 0.303926  | C | 7.331502  | 3.70437   | 1.173625  |
| C | 2.48685   | -0.69185  | -0.231547 | C | 7.364047  | 4.549202  | 2.284603  |
| C | -4.95139  | -3.308705 | 1.511563  | C | -7.364151 | 4.54951   | -2.283739 |
| C | -2.444945 | -3.318031 | 1.221552  | C | -6.192584 | 4.776002  | -3.008549 |
| C | 1.249007  | -1.391292 | -0.304036 | C | 6.192459  | 4.775559  | 3.009421  |
| C | 0.000007  | -0.699564 | -0.000132 | H | -0.334752 | -3.226361 | 0.998616  |
| C | -1.249006 | 1.391372  | -0.303742 | H | -2.411879 | -4.329215 | 1.616684  |
| C | 2.486835  | 0.6919    | 0.231482  | H | 2.411973  | -4.328868 | -1.617633 |
| C | 3.670188  | -1.344712 | -0.626679 | H | 0.334766  | 3.226175  | 0.999278  |
| C | -0.000003 | 0.699582  | 0.000015  | H | -4.10157  | -4.325777 | 3.215218  |
| C | -3.67019  | 1.34482   | -0.626436 | H | 0.334784  | -3.22611  | -0.999428 |
| C | -3.670149 | -1.344857 | 0.626425  | H | 8.23501   | -3.528772 | -0.595289 |
| C | 2.444997  | -3.31777  | -1.222276 | H | -6.207474 | -5.425753 | 3.87986   |
| C | 1.268896  | 2.702394  | 0.839228  | H | 2.411901  | 4.328915  | 1.617522  |
| C | -6.138753 | -3.092584 | 0.790967  | H | -8.235083 | -3.528608 | 0.59514   |
| C | -2.48685  | 0.691911  | -0.231406 | H | -8.293202 | -5.028098 | 2.581181  |
| C | 4.951464  | -3.308397 | -1.512111 | H | 4.101819  | -4.324799 | -3.216242 |
| C | -5.000215 | -4.162936 | 2.62677   | H | -0.334828 | 3.226359  | -0.998765 |
| C | 1.268922  | -2.70235  | -0.839353 | H | 8.293333  | -5.027556 | -2.581843 |
| C | -3.683782 | 2.653254  | -1.104442 | H | -2.411993 | 4.329184  | -1.616769 |
| C | 3.670161  | 1.344757  | 0.62665   | H | 6.207801  | -5.424656 | -3.880976 |
| C | 3.683751  | -2.653052 | -1.10493  | H | -8.235147 | 3.528519  | -0.594996 |
| C | 3.683728  | 2.653101  | 1.104898  | H | -4.101744 | 4.325701  | -3.215245 |
| C | -6.138819 | 3.092519  | -0.790897 | H | 4.101622  | 4.325199  | 3.215992  |
| C | -4.951486 | 3.308645  | -1.511542 | H | 8.235095  | 3.528504  | 0.59571   |
| C | 6.138719  | -3.092576 | -0.791255 | H | 8.293244  | 5.027632  | 2.582024  |
| C | 7.331476  | -3.704492 | -1.173342 | H | -8.293361 | 5.02798   | -2.581057 |
| C | -6.192412 | -4.7761   | 3.008596  | H | -6.207688 | 5.425641  | -3.879823 |
| C | 2.444961  | 3.31781   | 1.222188  | H | 6.207534  | 5.425052  | 3.880805  |
| C | -7.331481 | -3.704577 | 1.173011  | H | 6.117995  | 2.460112  | -0.091819 |
| C | -7.36401  | -4.549613 | 2.283835  | H | 4.604127  | 0.794328  | 0.618007  |
| C | 5.000399  | -4.162224 | -2.627621 | H | -6.118015 | 2.460033  | 0.0923    |
| C | 4.951414  | 3.308439  | 1.512137  | H | -4.604148 | 0.794373  | -0.617882 |
| C | -1.268947 | 2.702534  | -0.838798 | H | -4.604113 | -0.794419 | 0.617909  |
| C | 6.138768  | 3.092448  | 0.791486  | H | -6.117992 | -2.460086 | -0.092222 |
| C | 7.364119  | -4.549134 | -2.284461 | H | 4.604177  | -0.79432  | -0.617974 |
| C | -2.44503  | 3.318004  | -1.221624 | H | 6.117838  | -2.460363 | 0.092135  |

Negative frequency = zero

Sum of electronic and thermal free energies = -1924.092714 Hartree

## 9. References

---

1. Gaussian 16, Revision B.01, M. J. Frisch, G. W. Trucks, H. B. Schlegel, G. E. Scuseria, M. A. Robb, J. R. Cheeseman, G. Scalmani, V. Barone, G. A. Petersson, H. Nakatsuji, X. Li, M. Caricato, A. V. Marenich, J. Bloino, B. G. Janesko, R. Gomperts, B. Mennucci, H. P. Hratchian, J. V. Ortiz, A. F. Izmaylov, J. L. Sonnenberg, D. Williams-Young, F. Ding, F. Lipparini, F. Egidi, J. Goings, B. Peng, A. Petrone, T. Henderson, D. Ranasinghe, V. G. Zakrzewski, J. Gao, N. Rega, G. Zheng, W. Liang, M. Hada, M. Ehara, K. Toyota, R. Fukuda, J. Hasegawa, M. Ishida, T. Nakajima, Y. Honda, O. Kitao, H. Nakai, T. Vreven, K. Throssell, J. A. Montgomery, Jr., J. E. Peralta, F. Ogliaro, M. J. Bearpark, J. J. Heyd, E. N. Brothers, K. N. Kudin, V. N. Staroverov, T. A. Keith, R. Kobayashi, J. Normand, K. Raghavachari, A. P. Rendell, J. C. Burant, S. S. Iyengar, J. Tomasi, M. Cossi, J. M. Millam, M. Klene, C. Adamo, R. Cammi, J. W. Ochterski, R. L. Martin, K. Morokuma, O. Farkas, J. B. Foresman, and D. J. Fox, Gaussian, Inc., Wallingford CT, **2016**.
2. (a) Becke, A. D. *Phys. Rev. A* **1988**, *38*, 3098. (b) Lee, C.; Yang, W.; Parr, R. G. *Phys. Rev. B* **1988**, *37*, 785.
3. Zheng, W.; Ikai, T.; Yashima, E. *Nat. Sci.* **2022**, *2*, e29219947.
